1 **The genome of *Auriculariopsis ampla* sheds light on fruiting body**  
2 **development and wood-decay of bark-inhabiting fungi**

3

4 Éva Almási<sup>1\*</sup>, Neha Sahu<sup>1\*</sup>, Krisztina Krizsán<sup>1</sup>, Balázs Bálint<sup>1</sup>, Gábor M. Kovács<sup>2,3</sup>, Brigitta  
5 Kiss<sup>1</sup>, Judit Cseklye<sup>4</sup>, Elodie Drula<sup>5,6</sup>, Bernard Henrissat<sup>5,6,7</sup>, István Nagy<sup>4</sup>, Mansi Chovatia<sup>8</sup>,  
6 Catherine Adam<sup>8</sup>, Kurt LaButti<sup>8</sup>, Anna Lipzen<sup>8</sup>, Robert Riley<sup>8</sup>, Igor V. Grigoriev<sup>8</sup>, László G.  
7 Nagy<sup>1&</sup>

8

9 <sup>1</sup>Synthetic and Systems Biology Unit, Institute of Biochemistry, Biological Research Center,  
10 HAS, Szeged, 6726, Hungary

11 <sup>2</sup>Department of Plant Anatomy, Institute of Biology, Eötvös Loránd University, Budapest, 1117,  
12 Hungary

13 <sup>3</sup>Plant Protection Institute, Centre for Agricultural Research, Hungarian Academy of Sciences,  
14 Budapest, 1022, Hungary

15 <sup>4</sup>Seqomics Ltd. Mórahalom, Mórahalom 6782, Hungary

16 <sup>5</sup>Architecture et Fonction des Macromolécules Biologiques (AFMB), CNRS, Université Aix-  
17 Marseille, 163 Avenue de Luminy, 13288, Marseille, France

18 <sup>6</sup>INRA, USC 1408 AFMB, 13288, Marseille, France

19 <sup>7</sup>Department of Biological Sciences, King Abdulaziz University, Jeddah, 21589, Saudi Arabia

20 <sup>8</sup>US Department of Energy Joint Genome Institute, 2800 Mitchell Drive, Walnut Creek, CA  
21 94598 CA

22

23 \* These authors contributed equally to this work.

24 &Author for correspondence: László G. Nagy e-mail: [lnagy@fungenomelab.com](mailto:lnagy@fungenomelab.com)

25

## 26 **Abstract**

27 The Agaricomycetes are fruiting body forming fungi that produce some of the most efficient  
28 enzyme systems to degrade woody plant materials. Despite decades-long interest in the  
29 ecological and functional diversity of wood-decay types and in fruiting body development, the  
30 evolution of the genetic repertoires of both traits are incompletely known. Here, we sequenced  
31 and analyzed the genome of *Auriculariopsis ampla*, a close relative of the model species  
32 *Schizophyllum commune*. Comparative analyses of wood-decay genes in these and other  
33 Agaricomycetes species revealed that the gene family composition of *A. ampla* and *S. commune*  
34 are transitional between that of white rot species and less efficient wood-degraders (brown rot,  
35 ectomycorrhizal). Rich repertoires of suberinase and tannase genes were found in both species,  
36 with tannases generally restricted to species that preferentially colonize bark-covered wood.  
37 Analyses of fruiting body transcriptomes in both *A. ampla* and *S. commune* highlighted a high  
38 rate of divergence of developmental gene expression. Several genes with conserved  
39 developmental expression were found, nevertheless, including 9 new transcription factors as well  
40 as small secreted proteins, some of which may serve as fruiting body-specific effector molecules.  
41 Taken together, the genome sequence and developmental transcriptome of *Auriculariopsis ampla*  
42 has highlighted novel aspects of wood-decay diversity and of fruiting body development in  
43 mushroom-forming fungi.

44

## 45 **Introduction**

46 Mushroom-forming fungi (Agaricomycetes) are of great interest for comparative genomics due  
47 to their importance as wood-degraders in global carbon cycling and as complex multicellular  
48 organisms that produce agriculturally or medicinally relevant fruiting bodies. Recent advances in  
49 genome sequencing has brought new light on several aspects of lignocellulose decomposition  
50 and the genetic repertoire of fruiting body development in mushroom-forming fungi <sup>1-5</sup>.

51         The Agaricomycetes display diverse strategies to utilize lignocellulosic substrates. While  
52 genomic analyses have helped to uncover the main patterns of duplication and loss of plant cell  
53 wall degrading enzyme (PCWDE) families, our understanding of the enzymatic repertoires of  
54 Agaricomycetes and how they use it to degrade various lignocellulosic components of plants is  
55 far from complete. Fungi have traditionally been classified either as white rot, in which all  
56 components of the plant cell wall are being degraded <sup>6</sup>, or brown rot, in which mostly cellulosic  
57 components are degraded, but lignin is left unmodified or only slightly modified <sup>7</sup>. Several  
58 species have been recalcitrant to such classification, which prompted a reconsideration of the  
59 boundaries of the classic WR and BR dichotomy <sup>8,9</sup>. Such species are found across the fungal  
60 phylogeny, but seem to be particularly common among early-diverging Agaricales, including the  
61 Schizophyllaceae, Fistulinaceae and Physalacriaceae <sup>2,8,9</sup>. *Schizophyllum commune*, the only  
62 hitherto genome-sequenced species in the Schizophyllaceae, for example, produces white rot like  
63 symptoms, but lacks hallmark gene families (e.g. lignin-degrading peroxidases) of WR fungi <sup>2,8-</sup>  
64 <sup>10</sup>. Accordingly, it lacks the ability to degrade lignin and achieves weak degradation of wood  
65 <sup>9,11,12</sup>, although this might be complemented by pathogenic potentials on living plants or the  
66 activity of other, more efficient degraders that co-inhabit the same substrate<sup>13</sup>. Analyses of the  
67 secretome and wood-decay progression of *S. commune* revealed both WR and BR-like behaviors  
68 <sup>10,14</sup>, although several questions on the biology of this species remain open.

69 Fruiting body production, is a highly integrated developmental process triggered by a  
70 changing environment, such as a drop in temperature, nutrient depletion or shifts in light  
71 conditions<sup>15–17</sup>. It results from the concerted expression of structural and regulatory<sup>1,18–22</sup> genes  
72 as well as other processes, such as alternative splicing<sup>3,23</sup>, allele-specific gene expression<sup>3</sup> and  
73 probably selective protein modification<sup>3,24</sup>. Known structural genes include hydrophobins<sup>25–27</sup>,  
74 lectins<sup>28–30</sup>, several cell wall chitin and glucan-active CAZymes<sup>5,31–33</sup>, and probably cerato-  
75 platanins, expansin-like<sup>3,4</sup> and an array of other genes<sup>34</sup>. Regulators of fruiting body  
76 development have been characterized in several species, in particular in *Coprinopsis cinerea*  
77<sup>18,19,35–37</sup> and *S. commune*<sup>1,2,24</sup>. Despite much advance in this field, several aspects of fruiting  
78 body development are quite poorly known, including, for example what genes have conserved  
79 developmental roles across fruiting body forming fungi or how cell-cell communication is  
80 orchestrated in developing fruiting bodies. *S. commune* has served as a model organism for  
81 fruiting body development for a long time<sup>2,15,16</sup>. This species, like other Schizophyllaceae (e.g.  
82 the genus *Auriculariopsis*) produce cyphelloid fruiting bodies, which are reduced morphologies  
83 derived from more complex ancestors. Cyphelloid fruiting bodies are inverted cup-like forms  
84 with unstructured (e.g. *A. ampla*) or slightly structured (e.g. *S. commune*) spore-bearing surfaces  
85 (hymenophore). Albeit the hymenophore structure of *S. commune* resembles gills (hence the  
86 common name 'split gill'), it is not homologous to real gills of mushrooms, rather, it results from  
87 the congregation of several individual cup-like fruiting bodies.

88 We sequenced the genome of *Auriculariopsis ampla*, a close relative of *S. commune* that  
89 primarily inhabits the bark of dead logs and produces simple, cup-shaped fruiting bodies.  
90 Through analyses of gene repertoires for plant cell wall degradation in *A. ampla*, *S. commune*  
91 and 29 other Agaricomycetes, we detect signatures of adaptation to wood colonization through  
92 the bark and suggest that these two species have unusual plant cell wall degrading enzyme

93 repertoires. By sequencing developmental transcriptomes of *A. ampla* and comparing it to that of  
94 *S. commune*, we identify conserved developmental genes that might be linked to fruiting body  
95 development, including small secreted proteins, some of which show extreme expression  
96 dynamics in fruiting bodies.

97

## 98 **Results and Discussion**

### 99 ***Auriculariopsis* has a typical Agaricales genome**

100 The genome of *Auriculariopsis* was sequenced using PacBio, assembled to 49.8 Mb of DNA  
101 sequence in 351 scaffolds with a mean coverage of 54.38x (343 scaffolds >2 kpb, N50: 19, L50:  
102 0.53 Mb). We predicted 15,576 protein coding genes, based on which BUSCO analysis showed a  
103 98.6% degree of completeness (273 complete, 28 duplicated, 2 fragmented, 2 missing). We  
104 included *A. ampla* and its close relative *Schizophyllum commune* in a comparative analysis with  
105 29 other Agaricomycetes. A species phylogeny was reconstructed from 362 single-copy  
106 orthologs (14,2436 amino acid characters) for the 31 taxa; the inferred topology resembles  
107 published genome-scale trees of Agaricomycetes very closely and received strong (>85%)  
108 bootstrap support for all but two nodes (Figure 1a). *Auriculariopsis ampla* clustered with *S.*  
109 *commune*, together representing the Schizophyllaceae, with their immediate neighbor being  
110 *Fistulina hepatica* (Fistulinaceae). The gene repertoire of *A. ampla* (15,576 genes) is very similar  
111 to that of *S. commune*<sup>2</sup> (16,319 genes) and the average gene count in the analyzed Agaricales  
112 species (17,655), but more than that of *F. hepatica*<sup>9</sup> (11,244 genes). We found 8 significantly  
113 overrepresented (p-value<=0.05) and 16 underrepresented (p-value<=0.05) InterPro domains in  
114 both species, relative to the other 29 species (Supplementary Table 1).

## 115 ***Auriculariopsis* and *Schizophyllum* have unusual wood-decay strategies**

116 The substrate-wise phylogenetic PCA portrays a separation of these two species from the other  
117 29 species used in this dataset. In the case of cellulases, these two species cluster together with  
118 WRs and S/L/O, suggesting a similar arsenal of CAZymes acting on the cellulose degradation  
119 (Figure 1b). Enzyme families acting on crystalline cellulose (cellobiohydrolases - GH6, GH7)  
120 were present in lower numbers than in WRs and S/L/O species, but similar to ectomycorrhizal  
121 ones. The pattern was mostly identical for hemicellulases and pectinases (Figure 1b) where  
122 CAZyme copy numbers were similar to that of white rotters and litter decomposers. However,  
123 some CAZymes related to xylanase and pectinase activities including xylosidases, pectate lyases,  
124 pectin acetyl esterases, and acetyl xylan esterases (AA8, GH30, GH43, GH95, CE12, PL1, PL3,  
125 PL4) have higher copy numbers in the two species than in most WRs. This could imply their role  
126 in hemicellulose and pectin degradation, as reported previously<sup>10</sup>. However, ligninolytic  
127 CAZymes revealed a clear difference from WR species. The absence of class II peroxidases in  
128 both species<sup>6-8</sup>, made them cluster towards ectomycorrhizal and BR species. Copper radical  
129 oxidases (CROs) are known to be responsible for the production hydrogen peroxide and were  
130 also reported to have a significantly different repertoires in BRs and WRs<sup>9</sup>. In our analysis we  
131 found very low numbers of CROs (AA5) in *Auriculariopsis* and *Schizophyllum* as compared to  
132 ECM, S/L/O and WR species.

133 Because *A. ampla* and *S. commune* often occur on bark as first colonizers, we also  
134 examined protein families that putatively degrade important bark compounds. Suberin, lignin  
135 and tannins represent the major components of bark<sup>38-40</sup>. We built on previous datasets to obtain  
136 putative suberinase<sup>38,39</sup> and tannase<sup>40</sup> copy numbers for 31 species in our dataset. In general,  
137 suberin comprises aromatic compounds cross linked by poly-aliphatic and fatty-acid like  
138 components which requires extracellular esterases and lipases for their breakdown<sup>38</sup>. Based on

139 phylogenetic PCA of putative suberinases *A. ampla* and *S. commune* were transitional between  
140 typical WR and ECM, BR (*Fistulina*), uncertain (*Cylindrobasidium*, *Pluteus*) or tentative WR  
141 (*Fibulorhizoctonia*) species. This separation is most pronounced along the first axis (PC1), the  
142 main contributor of which is the AA3 family. *A. ampla* and *S. commune* had few genes in this  
143 family, similar to most ECM species. In terms of most other families, *A. ampla* and *S. commune*  
144 resembled WR species. The cutinase (CE5) repertoires of the two species are similar to those of  
145 litter decomposers and certain WR taxa (e.g. *Galerina*, *Dendrothele*, *Fibulorhizoctonia*, and  
146 *Peniophora*), although this family was missing from several WR species. Tannin acyl hydrolases  
147 (tannase, EC 3.1.1.20) are responsible for the degradation of tannins, polyphenolic plant  
148 secondary metabolites characteristic to the bark and wood tissues. Tannases were found in 10 out  
149 of 31 species, mostly in those that occur preferentially on bark, such as *Auriculariopsis*,  
150 *Schizophyllum*, *Peniophora*, *Dendrothele* and *Plicaturopsis*, and a few others (*Gymnopus*,  
151 *Pterula*, *Fibulorhizoctonia*, *Omphalotus* and *Fistulina*). This could indicate a specialization of  
152 these species to substrates with high tannin content, such as bark, suggesting adaptations to the  
153 early colonization of bark-covered wood. Notably, *Pluteus*, a species with an uncertain  
154 nutritional mode, groups closely together with *A. ampla* and *S. commune* on the suberinase PCA,  
155 although it had low pectinase, hemicellulase and cellulase copy numbers, leading to a position  
156 close to ECM species and some litter decomposers in other PCA analyses (Supplementary Figure  
157 1).

## 158 **Transcriptomics reveals a high rate of developmental evolution**

159 *Auriculariopsis ampla* and *S. commune* have a similar developmental progression (Figure 2a-2e),  
160 permitting a comparison of their transcriptional programs. Fruiting body development starts in  
161 both species with the appearance of minute globose primordia (stage 1 primordia), in which a  
162 cavity develops (Stage 2 primordia). This cavity further expands in *A. ampla* to produce an open,

163 pendant fruiting body (Young fruiting body and fruiting body stages), whereas in *S. commune*  
164 several such units form a multi-lobed assemblage.

165 For comparison with *S. commune*, we generated RNA-Seq data from 5 developmental  
166 stages of *A. ampla* (vegetative mycelium, stage 1 and stage 2 primordia, young and mature  
167 fruiting bodies, see Figure 2a-b,d) in biological triplicates, >30 million (30-78M, mean: 46M)  
168 paired-end 150 base reads for each sample on Illumina platform (mean read mapping: 83%,  
169 Supplementary Table 2). Corresponding data for the same developmental stages (Figure 2c, e)  
170 for *S. commune* were taken from (ref. 3). Based on global transcriptome similarity, fruiting body  
171 samples grouped together away from vegetative mycelium ones (Figure 3a) consistent with the  
172 complex multicellular nature of fruiting bodies as opposed to a simpler cellularity level of  
173 vegetative mycelia. Among the fruiting body samples, stage 1 and stage 2 primordia were similar  
174 to each other, whereas young fruiting bodies and mature fruiting bodies formed distinct groups.  
175 We identified 1466 developmentally regulated genes in *A. ampla*, which is similar in magnitude  
176 to that reported for *S. commune*, but less than that for more complex species (e.g. *Coprinopsis*,  
177 *Armillaria*; taken from (ref. 3). Of the developmentally regulated genes, 967 showed a  
178 significant ( $\geq 4$ ) fold change in the transition from vegetative mycelium to stage 1 primordia. In  
179 terms of significantly differentially expressed genes (DEGs), the highest numbers of up and  
180 downregulated were also found between vegetative mycelium and stage 1 primordia (1166 and  
181 842 genes, Figure 3b), which is consistent with the position of samples on the MDS plot (Figure  
182 3a). Much fewer genes were differentially expressed between stage 1 and 2 primordia and  
183 between stage 2 primordia and young fruiting bodies. In fruiting bodies, we found 110 and 37  
184 significantly up- and downregulated genes, respectively, a comparatively higher number that is  
185 potentially related to sporulation.



186 We assessed the similarity between the 2 species' developmental transcriptomes by  
187 analyzing the expression of one-to-one orthologous gene pairs, hereafter referred to as co-  
188 orthologs. To identify co-orthologs, proteomes of *A. ampla* and *S. commune* were clustered into  
189 18,804 orthogroups using MCL, of which 7463 represented co-orthologs. Of these, 7369 co-  
190 orthologs were expressed under our experimental conditions in both species (Supplementary  
191 Table 3). Pairwise comparison between developmental stages showed highest similarity within  
192 species across all 7369 co-orthologs (Figure 4a). This pattern was more pronounced in an  
193 analysis of developmentally regulated co-orthologs (Figure 4b, see Methods), indicating that  
194 developmental gene expression in *A. ampla* and *S. commune* has diverged since their common  
195 ancestor so that similarity between homologous fruiting body stages of the two species is lower  
196 than that between different stages of the same species. Vegetative mycelia of both species  
197 differed most from all other stages of the same species but showed some similarity across  
198 species. Similarly, we observed a strong similarity between young fruiting bodies and fruiting  
199 bodies of *A. ampla* and *S. commune*, indicating that late stages of fruiting body development  
200 share more similarity across species than do early stages. Similar patterns were observed when  
201 the analyses were restricted to co-orthologous transcription factors (Figure 4c) and its  
202 developmentally regulated subset (Figure 4d). Similarity between late developmental stages of  
203 the two species was more pronounced in the analysis of developmentally regulated genes. Given  
204 that *A. ampla* and *S. commune* are each other's closest relatives, the low similarity of gene  
205 expression among their fruiting bodies (Figure 4) indicates that developmental gene expression  
206 has diverged at a high speed since their divergence. This is surprising in comparison to similar  
207 analyses of animals, where gene expression patterns could be predicted from tissue identities  
208 across the entire mammalian clade<sup>41</sup>. This suggests that fruiting body development evolved at a  
209 high rate, erasing identities of similar developmental stages across species. Nevertheless, these

210 data show that during fruiting body maturation gene expression dynamics shows conserved  
211 patterns among phylogenetically closely related species. These data further indicate that there  
212 should be genes with similar expression profiles in *A. ampla* and *S. commune*.

213 Despite the low global similarity, several genes with conserved expression patterns could  
214 be identified. The most highly upregulated co-ortholog in *A. ampla* and *S. commune* was a heat  
215 shock protein 9/12 family member, that is homologous to *Aspergillus nidulans* awh11 and *S.*  
216 *cerevisiae* hsp12, farnesol-responsive heat shock proteins. These genes had a significant  
217 upregulation in stage 1 primordia of both *A. ampla* and *S. commune* (fold change 254x and 855x,  
218 respectively) and had high expression values in all fruiting body tissues (>5,000 FPKM,  
219 maximum fold change within fruiting bodies 3.4-3.7), suggesting an important role of heat shock  
220 proteins during fruiting body development. In further support of this hypothesis, homologs of  
221 these genes were found developmentally regulated or differentially expressed also in *Laccaria*  
222 *bicolor*<sup>21</sup>, *Lentinula edodes*<sup>42</sup>, *Armillaria ostoyae*, *Coprinopsis cinerea*, *Lentinus tigrinus*, and  
223 *Rickenella mellea*<sup>3</sup>. Another co-orthogroup with large upregulation in stage 1 primordia  
224 included A1 aspartic proteases, although the expression dynamics were somewhat different in  
225 the two species. We observed an induction in stage 1 primordia in both, but, while upregulation  
226 in *A. ampla* was >200x compared to VM, it was only 14x in *S. commune*. Aspartic proteases of  
227 the diverse A1 family have been reported as highly induced in fruiting bodies in several previous  
228 studies<sup>3,21,42-44</sup>, although no mechanistic hypothesis for their role in fruiting body development  
229 has been proposed yet.

### 230 **Putative fruiting body genes are developmentally expressed**

231 We further examined the expression patterns of previously reported fruiting body genes in *A.*  
232 *ampla*. Of the fungal cell wall (FCW) associated genes, hydrophobins were mostly  
233 developmentally regulated (8 out of 11 genes) in *A. ampla* (Supplementary Figure 2), often with

234 significantly increased expression coincident with the transition from vegetative mycelium to  
235 stage 1 primordia (in six genes), as observed previously<sup>1,42,45–47</sup>. Several members of two  
236 functionally similar families, cerato-platanins (4 of 5 genes dev. reg.) and expansin-like genes  
237 (10 of 21 genes) were likewise developmentally regulated. Although cerato-platanins and  
238 expansins were often associated with the plant cell wall<sup>48,49</sup>, their dynamic expression in fruiting  
239 bodies suggest potential FCW-related roles. Functional annotations uncovered several putatively  
240 FCW-active CAZymes (Supplementary Figure 3), including chitin- and glucan- active GH and  
241 GT families, carbohydrate-binding modules, carbohydrate esterases, AA1 multicopper oxidases,  
242 AA9 lytic polysaccharide monooxygenases, but also starch synthesizing glycosyl transferases  
243 (e.g. GH15, CBM20), which might be related to the mobilization of glycogen reserves during  
244 development. Two out of 10 members of the Kre9/Knh1 family were developmentally regulated.  
245 This family is involved in  $\beta$ -1,6-glucan synthesis and remodeling in *Aspergillus fumigatus*<sup>50</sup>,  
246 *Candida albicans*<sup>51</sup>, *Saccharomyces cerevisiae*<sup>52</sup> and *Ustilago maydis*<sup>53</sup> and has been shown to  
247 be developmentally expressed in Agaricomycetes fruiting bodies<sup>3,54</sup>. Its widespread FCW-  
248 associated role in both Asco- and Basidiomycota suggests a plesiomorphic role in  $\beta$ -glucan  
249 assembly in the cell wall and suggests that this family has been co-opted for fruiting body  
250 development in Agaricomycetes. Several other previously reported putatively FCW-active  
251 CAZyme families<sup>3,21,42,55–58</sup> (e.g. GH5, GH142<sup>5,59–61</sup>, Supplementary Figure 2), also showed  
252 developmental expression in *A. ampla*, reinforcing the view that cell wall remodeling is a  
253 fundamental mechanism in fruiting body development<sup>2,3,5,21,31,58,62–64</sup>.

254 Defense related genes have been in the focus of research on fruiting bodies. We found  
255 developmentally regulation of a diverse array of putative defense-related genes by searching for  
256 homologs of *Coprinopsis* defense genes<sup>65</sup>. *A. ampla* and *S. commune* have reduced repertoires of  
257 defense-related genes compared to *Coprinopsis cinerea* (Supplementary Figure 2). For example,

258 no homologs of aegerolysins or the ETX/MTX2 pore forming toxin family have been found in  
259 their genomes, whereas lectins are only represented by 14 genes as opposed to 39 and 25 in *C.*  
260 *cinerea* and *A. ostoyae*. They have several genes in the thaumatin family, with has been  
261 associated with defense<sup>65</sup> in both fungi and plants<sup>66,67</sup>, fungal pathogenicity<sup>68</sup> but also with  
262 FCW remodeling<sup>62,69</sup>, depending on the scope of the study. Based on its endo- $\beta$ -1,3-glucanase  
263 activity, its efficiency in degrading cell wall components of *Lentinula edodes*<sup>62</sup> and  
264 *Saccharomyces*<sup>69</sup> and developmental expression in axenic fruiting bodies, it appears likely that  
265 members of this family are involved in FCW remodeling, although antimicrobial activities have  
266 also been predicted for certain members<sup>3</sup>. Cerato-platanins represent a similar case. This is a  
267 family widely expressed in pathogenic fungal-plant interactions<sup>70,71</sup>, fruiting bodies<sup>3,4,71</sup> and  
268 defense assays<sup>65</sup> and significantly enriched in Agaricomycetes genomes<sup>3,70</sup>. We detected four  
269 developmentally regulated cerato-platanin genes in *A. ampla*, three of which showed an  
270 induction at the transition from vegetative mycelium to stage 1 primordia (Supplementary Figure  
271 2). *S. commune* had three developmentally regulated cerato-platanins, with non-matching  
272 expression profiles. Further, in *A. ampla* we found 3 developmentally regulated lectin genes  
273 (Supplementary Figure 2), as opposed to *S. commune*, which had 8<sup>3</sup>. All three genes belong to  
274 the ricin-B lectin family and harbor a CBM13 domain, which has demonstrated mannose, N-  
275 acetylgalactosamine and xylane binding activities<sup>72,73</sup>. Ricin-B lectins have been reported as  
276 developmentally expressed in fruiting bodies of all Agaricomycetes tested so far<sup>3,4,28,42,57,65</sup>,  
277 although its functions are less clear. It is the largest family of basidiomycete lectins<sup>3</sup> and was  
278 shown to be toxic to nematodes<sup>29,74</sup>, although their diverse carbohydrate-binding abilities  
279 (mannose and N-acetylgalactosamine) could confer additional or other functions as well.

280 F-box and BTB/POZ domain containing proteins have recently been reported as an  
281 interesting family with probable functions in fruiting body development and a significant

282 expansion in the Agaricomycetes<sup>3</sup>. *Auriculariopsis* has 246 F-box protein encoding genes, of  
283 which 12 were developmentally regulated in our dataset. Of the 96 BTB/POZ domain-containing  
284 proteins 26 were developmentally regulated, including some genes with remarkable expression  
285 dynamics during development (e.g. fold change 526x, Auramp1\_515369). This is similar to  
286 figures reported for *S. commune*<sup>3</sup>. These domains are involved in protein-protein interactions  
287 and have been reported to act as transcriptional repressors<sup>75</sup>, members of selective proteolysis  
288 pathways, and include homologs of yeast *Skp1*<sup>76</sup> too. Although very little functional information  
289 on these families is available in fungi, their expression dynamics in development and previously  
290 reported regulatory roles suggest they could be important players in fruiting body development.

### 291 **Conserved patterns of transcription factors expression**

292 We examined expression patterns of transcription factors (TFs) and their similarity between the  
293 two species. We identified 433 and 437 TFs in the genomes of *A. ampla* and *S. commune*  
294 respectively, of which 252 were co-orthologs. These were distributed across 28 TF families, with  
295 C2H2-type Zinc finger and Zn (2)-C6 fungal-type TFs being the most dominant (Supplementary  
296 Table 4). Individually, 14,5% and 16% of the *Auriculariopsis* and *Schizophyllum* and 17% of the  
297 co-orthologous TFs were developmentally regulated, respectively.

298 These included 5 of the eight previously characterized TF genes of *S. commune*<sup>1</sup>: *c2h2*,  
299 *gat1*, *hom1*, *teal* and *fst4* showed significant changes in expression, in most cases at the  
300 initiation of fruiting body development, whereas *fst3*, *bri1* and *hom2* showed more or less flat  
301 expression profiles (Figure 5). These expression profiles are consistent with previous RNA-Seq  
302 based reports<sup>24</sup> in *Schizophyllum* and other species<sup>65,77-79</sup>, except in *hom1* and *gat1*, which, in  
303 our data behaved differently, probably due to the different resolution of developmental stage  
304 data. The expression profiles of all eight genes were very similar between *A. ampla* and *S.*  
305 *commune*. Homologs of *Lentinula edodes PriB*<sup>80,81</sup> (Auramp1\_518770, Schco3\_2525437) were

306 also developmentally regulated, with an expression peak in stage 1 primordia. Homologues of  
307 *Coprinopsis expl*, which was reported to be involved in cap expansion<sup>82</sup>, were present in both  
308 species and had a matching expression profile, but were not developmentally regulated in our  
309 data. In our experiments, *expl* homologs (Auramp1\_481073, Schco3\_2623333) showed highest  
310 expression in vegetative mycelia and lower expression afterwards, which might be related to the  
311 lack of proper caps in *A. ampla* and *S. commune*.

312         Of the 252 co-orthologous TFs, 42 were developmentally regulated in both species, 27 of  
313 which had similar expression profiles between *A. ampla* and *S. commune*. Nine of the most  
314 interesting of these TFs are shown on Figure 5. Three of these genes showed highest expression  
315 in vegetative mycelia and are probably not relevant to fruiting body development. For the other  
316 six genes an upregulation was observed at the transition from vegetative mycelia to stage 1  
317 primordia, which is compatible with potential roles in the initiation of fruiting body development  
318 or accompanying morphogenetic changes. Such TFs, with conserved, developmentally dynamic  
319 expression might be related to sculpting the specialized, cyphelloids fruiting body morphologies  
320 of *Auriculariopsis* and *Schizophyllum* or more widely conserved fruiting body functions. This  
321 also shows the power of comparative transcriptomics to identify genes with conserved  
322 expression patterns during fruiting body development<sup>83</sup> and to generate hypotheses that are  
323 testable by gene knockouts or functional assays.

### 324 **Small secreted proteins show dynamic expression in fruiting bodies**

325 We detected several genes encoding short proteins with extracellular secretion signals (SSPs) in  
326 the fruiting body transcriptomes. In *A. ampla* and *S. commune* 316 and 354 SSPs were detected,  
327 respectively, half of which contained no known InterPro domains (Figure 6a, Supplementary  
328 Table 6). The SSPs in the two species belonged to 283 orthologs in *A. ampla*, and 315 in *S.*  
329 *commune*. Out of these, 133 orthologs were shared by the two species, whereas 150 and 182

330 were specific to *A. ampla* and *S. commune*, respectively (Figure 6b). The 133 shared orthologs  
331 contained 162 proteins, of which 39 were developmentally regulated in *A. ampla* and 158, with  
332 54 developmentally regulated in *S. commune*. From these, 20 orthologs were developmentally  
333 regulated in both species (Figure 6d) and had a similar expression profile. Annotated SSPs in the  
334 two species (Figure 6c) had similar expression dynamics and mainly comprised hydrophobins,  
335 ceratoplatanins, CFEM domain containing proteins, concanavalin type lectins, and glycosyl  
336 hydrolases<sup>3</sup>. The 150 species specific orthogroups in *A. ampla* contained 154 proteins, of which  
337 32 are developmentally regulated. The 182 orthogroups in *S. commune* contained 196 proteins,  
338 of which 58 are developmentally regulated (Supplementary Figure 4).

339 We detected several developmentally regulated SSP-s with no annotations, some of  
340 which showed high expression dynamics (FC>50, Figure 6e). We found 8, 15 and 2,  
341 *Auriculariopsis*-specific, *Schizophyllum*-specific and shared SSPs, respectively, with no known  
342 domains but a high expression dynamics (Supplementary Figure 4, Supplementary Table 6). For  
343 example, one of the orthogroups (Auramp1\_494084, Auramp1\_549528, Schco3\_2664662)  
344 showed a considerable upregulation in stage 1 primordia in both species (FC=1166 - 1870),  
345 suggesting a role in the transition from vegetative mycelium to fruiting body initials. Such SSPs  
346 resemble effector proteins involved in cell-to-cell communication in ectomycorrhizal and  
347 pathogenic interactions between fungi and plants<sup>84,85</sup>. Their expression in fruiting bodies raises  
348 the possibility that they play signaling roles and may be responsible for sculpting the fruiting  
349 bodies of these fungi. SSPs with an upregulation in morphogenetic processes (ECM root tips  
350 and/or fruiting bodies) have been reported in *Laccaria*<sup>21,84,86</sup> and *Pleurotus*<sup>87</sup> suggesting a role  
351 in tissue differentiation and that some of the SSPs initially found in ECM root tips may actually  
352 be morphogenetic in nature. Whether morphogenesis-related SSPs occur ubiquitously among  
353 mushroom-forming fungi and what is the mechanistic basis of their role, needs further research.

## 354 **Conclusions**

355 In this study we presented the genome sequence of *Auriculariopsis ampla* and performed  
356 comparative genomic and transcriptomic analyses with *Schizophyllum commune* and other  
357 Agaricomycetes, to identify conserved genes related to fruiting body development and wood-  
358 decay. Our results showed that the two analyzed members of the Schizophyllaceae have a  
359 potential to shape our understanding of Agaricomycete biology. The CAZyme composition of *A.*  
360 *ampla* and *S. commune* compared to other 29 species suggests that the wood degrading strategies  
361 of the two species show similarity to WRs when concerned with cellulases, hemicellulases, and  
362 pectinolytic gene families. What sets them apart from WRs is the absence of class II PODs,  
363 which is also the case for BRs and ectomycorrhizal fungi. However, the reduction in ligninolytic  
364 genes is compensated by the presence of suberinases and tannases required to depolymerize  
365 important components bark, to which these species might be adapted.

366 Our analyses revealed a large number of genes with developmentally dynamic expression  
367 in fruiting bodies of both *A. ampla* and *S. commune*, including transcription factors (including 9  
368 new conserved TFs), carbohydrate-active enzymes, heat shock proteins, aspartic proteases, as  
369 well as small secreted proteins. Particularly interesting are SSP-s with a highly dynamic  
370 expression through development, due to the role of SSPs in intracellular communication in  
371 pathogenic and ectomycorrhizal associations<sup>84,85</sup>. Although mechanistic evidence is still lacking,  
372 it is conceivable that SSP-s with fruiting body specific expression might be involved in  
373 intercellular communication in fruiting bodies, similarly to their mycorrhiza and pathogenicity-  
374 related counterparts. This hypothesis would provide an explanation for the rich SSPs content of  
375 fruiting-body forming Agaricomycetes that are neither ectomycorrhizal or pathogenic<sup>3,84</sup>.

376 Our data also suggest that despite the close phylogenetic relatedness of *Auriculariopsis*  
377 and *Schizophyllum*, their developmental transcriptomes have diverged significantly since their



378 common ancestors, indicating a high rate of developmental gene expression in these taxa. Such  
379 divergence might be related to morphogenetic differences between the two species: while *A.*  
380 *ampla* produces simple cyphelloid (cup-shaped) fruiting bodies, those of *S. commune* consist of  
381 several congregated cyphelloid modules. Despite this divergence, several genes with a matching  
382 expression profile could be identified, highlighting conserved roles that await further  
383 experimentation. These data have the potential to highlight not only the genes involved in the  
384 development of cyphelloid fruiting bodies, but also that of other agaricomycete fruiting body  
385 types and as such, should be immensely useful to understanding the general principles and  
386 shared properties of fruiting body development in mushroom-forming fungi.

387

## 388 **Acknowledgements**

389 This work was supported by the ‘Momentum’ program of the Hungarian Academy of Sciences  
390 (Contract No. LP2014/12 to L.G.N.) and the European Research Council (Grant No. 758161 to  
391 L.G.N.). The work conducted by the U.S. Department of Energy Joint Genome Institute (JGI), a  
392 DOE Office of Science User Facility, was supported by the Office of Science of the U.S.  
393 Department of Energy under Contract No. DE-AC02-05CH11231. This work was supported by  
394 the National Research, Development and Innovation office (Contract No. Ginop-2.3.2-15-00002,  
395 to L.G.N.).

396

## 397 **Methods**

### 398 **Genome sequencing**

399 The sequenced strain of *Auriculariopsis ampla* was collected as fruiting bodies on the bark of in  
400 Szeged, Hungary and cultured in liquid malt-extract medium (deposited in Szeged

401 Microbiological Collections, under NL-1724). DNA was extracted using the DNeasy Blood &  
402 Tissue Culture kit (Qiagen), following the manufacturer's protocol. The genome was sequenced  
403 using Pacific Biosciences RS II platform. Unamplified libraries were generated using Pacific  
404 Biosciences standard template preparation protocol for creating >10kb libraries. 5 ug of gDNA  
405 was used to generate each library and the DNA was sheared using Covaris g-Tubes (TM) to  
406 generate sheared fragments of >10kb in length. The sheared DNA fragments were then prepared  
407 using Pacific Biosciences SMRTbell template preparation kit, where the fragments were treated  
408 with DNA damage repair, had their ends repaired so that they were blunt-ended, and 5'  
409 phosphorylated. Pacific Biosciences hairpin adapters were then ligated to the fragments to create  
410 the SMRTbell template for sequencing. The SMRTbell templates were then purified using  
411 exonuclease treatments and size-selected using AMPure PB beads. Sequencing primer was then  
412 annealed to the SMRTbell templates and Version P6 sequencing polymerase was bound to them.  
413 The prepared SMRTbell template libraries were then sequenced on a Pacific Biosciences RSII  
414 sequencer using Version C4 chemistry and 4-hour sequencing movie run times. Filtered subread  
415 data was assembled together with Falcon version 0.4.2  
416 (<https://github.com/PacificBiosciences/FALCON>) and subsequently polished with Quiver  
417 version smrtanalysis\_2.3.0. 140936.p5  
418 (<https://github.com/PacificBiosciences/GenomicConsensus>).

419 For transcriptome, Stranded cDNA libraries were generated using the Illumina Truseq  
420 Stranded RNA LT kit. mRNA was purified from 1 ug of total RNA using magnetic beads  
421 containing poly-T oligos. mRNA was fragmented and reversed transcribed using random  
422 hexamers and SSII (Invitrogen) followed by second strand synthesis. The fragmented cDNA was  
423 treated with end-pair, A-tailing, adapter ligation, and 8 cycles of PCR. The prepared library was  
424 quantified using KAPA Biosystem's next-generation sequencing library qPCR kit and run on a

425 Roche LightCycler 480 real-time PCR instrument. The quantified library was then multiplexed  
426 with other libraries, and the pool of libraries prepared for sequencing on the Illumina HiSeq  
427 sequencing platform utilizing a TruSeq paired-end cluster kit, v4, and Illumina's cBot instrument  
428 to generate a clustered flow cell for sequencing. Sequencing of the flow cell was performed on  
429 the Illumina HiSeq2500 sequencer using HiSeq TruSeq SBS sequencing kits, v4, following a  
430 2x150 indexed run recipe. Illumina fastq files were QC filtered for artifact/process contamination  
431 and de novo assembled with Trinity v2.1.1<sup>88</sup> and used for genome annotation

432         The genome was annotated using the JGI Annotation pipeline<sup>89</sup> and made available via  
433 JGI fungal genome portal MycoCosm ([jgi.doe.gov/fungi](http://jgi.doe.gov/fungi);<sup>89</sup>). The data also deposited at  
434 DDBJ/EMBL/GenBank under the accession (*TO BE PROVIDED UPON PUBLICATION*).

435

## 436 **Fruiting protocol, RNA extraction and transcriptome sequencing**

### 437 **Fruiting and RNA extraction**

438 *Auriculariopsis ampla* was grown on sterilized poplar (*Populus alba*) bark and wood plugged  
439 into malt-extract medium in 250 ml glass beakers. Cultures were pre-incubated for 14 days in the  
440 dark at 30°C, then transferred to room temperature 60 cm under a light panel of 6 Sylvania  
441 Activa 172 Daylight tubes, with a 12 hr light/dark cycle and >90% relative humidity. Primordia  
442 started to develop 7 days after the transfer to light.

443         Vegetative mycelium, Stage 1 and 2 primordia, young and mature fruiting bodies were  
444 collected with sterilized forceps, flash-frozen in liquid nitrogen and stored at -80°C. Stage 1 and  
445 2 primordia were defined as 0.1-1 mm closed, globular structures and 1-2 mm long initials with a  
446 central externally visible pit, respectively. We considered already opened fruiting bodies with a  
447 cup shape, 3-6 mm wide as young fruiting bodies and fully open ones as mature fruiting bodies.  
448 Total RNA was extracted from tissues ground to a fine powder in a mortar, using the Quick-

449 RNA Miniprep kit (Zymo Research), following the manufacturer's protocol. RNA samples with  
450 RIN>8 was saved for RNA-Sequencing. For each sample type three biological replicates were  
451 processed.

452

### 453 **RNA-Seq**

454 Whole transcriptome sequencing was performed using the TrueSeq RNA Library Preparation Kit  
455 v2 (Illumina) according to the manufacturer's instructions. RNA quality and quantity were  
456 assessed using RNA ScreenTape and Reagents on TapeStation (all from Agilent) and Qubit  
457 (ThermoFisher); only high quality (RIN >8.0) total RNA samples were processed. Next, RNA  
458 was DNaseI (ThermoFisher) treated and the mRNA was purified based on PolyA selection and  
459 fragmented. First strand cDNA synthesis was performed using SuperScript II (ThermoFisher)  
460 followed by second strand cDNA synthesis, end repair, 3'-end adenylation, adapter ligation and  
461 PCR amplification. Purification steps were performed using AmPureXP Beads (Beckman  
462 Coulter). Final libraries were quality checked using TapeStation. Concentration of each library  
463 was determined using either the qPCR Quantification Kit for Illumina (Agilent) or the KAPA  
464 Library Quantification Kit for Illumina (KAPA Biosystems). Sequencing was performed on  
465 Illumina instruments using the HiSeq SBS Kit v4 250 cycles kit (Illumina) generating >20  
466 million clusters for each sample.

467

### 468 **Bioinformatic analyses of RNA-Seq data**

469 RNA-Seq analyses were carried out as reported earlier<sup>3,4</sup>. Paired-end Illumina (HiSeq) reads  
470 were quality trimmed using CLC Genomics Workbench 9.5.2 (CLC Bio/Qiagen), removing  
471 ambiguous nucleotides as well as any low quality read ends. Quality cutoff value (error  
472 probability) was set to 0.05, corresponding to a Phred score of 13. Trimmed reads containing at

473 least 40 bases were mapped using the RNA-Seq Analysis 2.1 package in CLC requiring at least  
474 80% sequence identity over at least 80% of the read lengths; strand specificity was omitted.  
475 Reads with less than 30 equally scoring mapping positions were mapped to all possible locations  
476 while reads with more than 30 potential mapping positions were considered as uninformative  
477 repeat reads and were removed from the analysis.

478 “Total gene read” RNA-Seq count data was imported from CLC into R 3.0.2. Genes were  
479 filtered based on their expression levels keeping only those features that were detected by at least  
480 five mapped reads in at least 25% of the samples included in the study. Subsequently,  
481 “calcNormFactors” from “edgeR” 3.4.2<sup>90</sup> was used to perform data scaling based on the  
482 “trimmed mean of M-values” (TMM) method<sup>73</sup>. Log transformation was carried out by the  
483 “voom” function of the “limma” package 3.18.13<sup>91</sup>. Linear modeling, empirical Bayes  
484 moderation as well as the calculation of differentially expressed genes were carried out using  
485 “limma”. Genes showing at least four-fold gene expression change with an FDR value below  
486 0.05 were considered as significantly differentially expressed. Multi-dimensional scaling  
487 (“plotMDS” function in edgeR) was applied to visually summarize gene expression profiles  
488 revealing similarities between samples.

489 Developmentally regulated genes were defined as genes showing an >4-fold change in  
490 expression through development. In comparisons of vegetative mycelia and stage 1 primordia,  
491 we only considered genes upregulated in primordia, to exclude genes that showed a highest  
492 expression in vegetative mycelium because those might be related to processes not relevant for  
493 fruiting body development (e.g. nutrient acquisition).

#### 494 **Phylogenetic analysis**

495 Single-copy orthogroups were identified in MCL clusters of the 31 Agaricomycetes and were  
496 aligned by the l-ins-i algorithm of MAFFT<sup>92</sup>. Ambiguously aligned regions were removed using

497 the 'strict' settings of Trim-AI. Trimmed alignments longer than 100 amino acids were  
498 concatenated into a supermatrix. A maximum likelihood phylogenetic analysis was performed in  
499 RAxML 8.2.11 under the PROTGAMMALG model, with a gamma-distributed rate  
500 heterogeneity and a partitioned model. A bootstrap analysis in 100 replicates was performed.

### 501 **Identification of orthologous groups and their functional annotations**

502 Groups of orthologous genes have been identified using OrthFinder v 1.1.8<sup>93</sup>, based on predicted  
503 protein sequences and the program's default parameters. Two analyses were performed, one to  
504 delimit orthogroups across 31 Agaricomycetes species and the second to find co-orthologs  
505 shared by *A. ampla* and *S. commune*, both using identical parameters. Functional annotation of  
506 proteins was carried out based on InterPro domains using InterProScan version 5.28-67.0 across  
507 the 31 fungal proteomes.

### 508 **Analyses of Carbohydrate Active Enzymes (CAZymes)**

509 The CAZymes in the 31 species used in this study were annotated using the CAZy annotation  
510 pipeline<sup>94</sup>. Copy numbers for most species were extracted from JGI Mycosm, whereas those  
511 of *Flammulina velutipes*, *Coprinopsis marcescibilis*, and *Galerina marginata* were annotated for  
512 this study. Of all the families found in the dataset, we took into account the CAZyme families  
513 reported having a putative role in plant cell wall degradation<sup>6,8,9,22</sup>(Supplementary Table 5) and  
514 analyzed their copy numbers across the 31 species. We used 45 CAZy families in our dataset  
515 (Supplementary Table 5) and divided them based on the degradation of celluloses,  
516 hemicelluloses, lignin, pectin.

517 In addition to these substrates, we also assessed genes encoding proteins with putative  
518 roles in suberin and tannin degradation. We extracted the best BLAST hits (BLAST 2.7.1+, e-  
519 value 0.001) from the 31 species for the homologs of proteins suggested to be related to suberin  
520<sup>38,39</sup> and tannin degradation<sup>40</sup>. We then identified the orthoMCL clusters of the 31 species

521 containing the best hits. The proteins belonging to these clusters were used for further analysis as  
522 putative suberinases or tannases (Supplementary Table 5).

523 In order to get insights into the nutritional strategies employed by *A. ampla* and *S.*  
524 *commune*, we compared copy numbers of these species to that of 29 Agaricomycetes species  
525 with one of five known nutritional modes: brown rotters (BR), ectomycorrhizal (ECM),  
526 saprotrophs/litter decomposers/organic matter degraders (S/L/O), white rotters (WR) and  
527 uncertain. To analyze the grouping of the species according to their substrate degradation  
528 capabilities, phylogenetic PCA was performed using the `phyl.pca`<sup>95</sup> function from the R package  
529 `phytools`<sup>96</sup>. A matrix of gene number normalized by proteome size in each organism  
530 (Supplementary Table 5), and the ML species tree, were used as input. Independent contrasts  
531 were calculated under the Brownian motion model and the parameter `mode="cov"`.

### 532 **Analyses of transcriptome similarity**

533 Pairwise comparisons of *A. ampla* and *S. commune* transcripts based on Pearson correlation  
534 coefficient among all replicates and developmental stages of 7369 OGs and among 1182 OGs  
535 containing at least one developmentally regulated gene were performed using custom Python  
536 script (`pandas` v 0.18.1 and `Matplotlib` v. 1.1.1 libraries). The same analysis has been performed  
537 for 252 single-copy ortholog transcription factors. The resulting matrix of Pearson correlation  
538 coefficients was plotted as a heatmap using the `Matplotlib` v. 1.1.1 `pyplot` framework. A  
539 scatterplot was constructed based on the log fold changes (FCs) of co-orthologs in *A. ampla* and  
540 *S. commune* using the ‘`ggplot`’ R package.

541 Heatmaps were created for developmentally regulated genes using the `heatmap.2`  
542 function of R ‘`gplot`’ package. Hierarchical clustering with Euclidean distance calculation and  
543 averaged-linkage clustering was carried out on the FPKM values using ‘`hclust`’ function in R,

544 and heatmaps was visualized using z-score normalization on the rows via the heatmap.2  
545 function.

## 546 **Identification of transcription factors and other fruiting body genes**

547 We identified transcription factor encoding genes in the proteomes of 31 Agaricomycetes species  
548 based on InterPro annotations. Only proteins containing domains with sequence-specific DNA  
549 binding ability were considered as transcription factors <sup>3</sup>.

550 Carbohydrate active proteins were identified through the CAZy pipeline as described above.

551 We extracted the kinases of the 2 species based on their InterPro domain composition and  
552 eliminated the ones involved in metabolism. Based on BLAST (v2.7.1+, e-value 0.001) against  
553 the classified kinome of *Coprinopsis cinerea* (Kinbase, Stajich et al., 2010), we assigned the best  
554 hits into the kinase categories of the query protein (<sup>97,98</sup>; [www.kinase.com](http://www.kinase.com)). Heatmaps were  
555 created using the Heatmap.2 function in R and are based on the FPKM values of  
556 developmentally regulated genes.

## 557 **Analyses of small secreted proteins**

558 Small Secreted Proteins (SSPs) were identified for the two species to grasp species-specific and  
559 conserved SSPs in the two species. SSPs were defined as proteins shorter than 300 amino acids,  
560 having a signal peptide, an extracellular localization and no transmembrane domain. Proteins  
561 shorter than 300 amino acids were subjected to signal peptide prediction through SignalP 4.1<sup>99</sup>  
562 with the option “eukaryotic”. The proteins having extracellular signal peptide were checked for  
563 their extracellular localization using WoLF PSORT 0.2 <sup>100</sup> with the option “fungi” and these  
564 were further checked for the absence of transmembrane helices, using TMHMM 2.0 <sup>101</sup>.

565



## 566 **References**

- 567 1. Ohm RA, de Jong JF, de Bekker C, Wösten HAB, Lugones LG. Transcription factor genes  
568 of *Schizophyllum commune* involved in regulation of mushroom formation. *Mol Microbiol.*  
569 2011;81(6):1433–45.
- 570 2. Ohm RA, De Jong JF, Lugones LG, Aerts A, Kothe E, Stajich JE, et al. Genome sequence  
571 of the model mushroom *Schizophyllum commune*. *Nat Biotechnol.* 2010;28(9):957–63.
- 572 3. Krizsan K, Almasi E, Merenyi Z, Sahu N, Viragh M, Koszo T, et al. Transcriptomic atlas of  
573 mushroom development highlights an independent origin of complex multicellularity.  
574 *bioRxiv.* 2018 Jun;349894.
- 575 4. Sipos G, Prasanna AN, Walter MC, O'Connor E, Bálint B, Krizsán K, et al. Genome  
576 expansion and lineage-specific genetic innovations in the forest pathogenic fungi  
577 *Armillaria*. *Nat Ecol Evol.* 2017 Dec;1(12):1931–41.
- 578 5. Sakamoto Y, Nakade K, Konno N. Endo- $\beta$ -1,3-Glucanase GLU1, from the fruiting body of  
579 *Lentinula edodes*, belongs to a new glycoside hydrolase family. *Appl Environ Microbiol.*  
580 2011;77(23):8350–4.
- 581 6. Floudas D, Binder M, Riley R, Barry K, Blanchette RA, Henrissat B, et al. The Paleozoic  
582 Origin of Enzymatic Lignin Decomposition Reconstructed from 31 Fungal Genomes.  
583 *Science.* 2012 Jun 29;336(6089):1715–9.
- 584 7. Martinez D, Challacombe J, Morgenstern I, Hibbett D, Schmoll M, Kubicek CP, et al.  
585 Genome, transcriptome, and secretome analysis of wood decay fungus *Postia*

- 586 *placentas* supports unique mechanisms of lignocellulose conversion. Proc Natl Acad Sci.  
587 2009;106(6):1954–9.
- 588 8. Riley R, Salamov AA, Brown DW, Nagy LG, Floudas D, Held BW, et al. Extensive  
589 sampling of basidiomycete genomes demonstrates inadequacy of the white-rot/brown-rot  
590 paradigm for wood decay fungi. Proc Natl Acad Sci U S A. 2014 Jul;111(27):9923–8.
- 591 9. Floudas D, Held BW, Riley R, Nagy LG, Koehler G, Ransdell AS, et al. Evolution of novel  
592 wood decay mechanisms in Agaricales revealed by the genome sequences of *Fistulina*  
593 *hepatica* and *Cylindrobasidium torrendii*. Fungal Genet Biol. 2015;76:78–92.
- 594 10. Zhu N, Liu J, Yang J, Lin Y, Yang Y, Ji L, et al. Comparative analysis of the secretomes of  
595 *Schizophyllum commune* and other wood-decay basidiomycetes during solid-state  
596 fermentation reveals its unique lignocellulose-degrading enzyme system. Biotechnol  
597 Biofuels [Internet]. 2016 Dec [cited 2019 Feb 3];9(1). Available from:  
598 <http://www.biotechnologyforbiofuels.com/content/9/1/42>
- 599 11. Schmidt O, Liese W. Variability of Wood Degrading Enzymes of *Schizophyllum commune*.  
600 *Holzforschung*. 1980 Jan;34(2):67–72.
- 601 12. Padhiar A, Albert S. Anatomical changes in *Syzygium cumuini* Linn. wood decayed by two  
602 white rot fungi *Schizophyllum commune* Fries. and *Flavodon flavus* (Klotzsch) Ryvarden. J  
603 *Indian Acad Wood Sci*. 2011 Jun;8(1):11–20.
- 604 13. Schmidt O, Liese W. Variability of Wood Degrading Enzymes of *Schizophyllum commune*.  
605 *Holzforschung*. 1980 Jan;34(2):67–72.

- 606 14. Takemoto S, Nakamura H, Imamura Y, Shimane T. Schizophyllum commune as a  
607 Ubiquitous Plant Parasite. Jpn Agric Res Q JARQ. 2010;44(4):357–64.
- 608 15. Kües U, Navarro-González M. How do Agaricomycetes shape their fruiting bodies? 1.  
609 Morphological aspects of development. Vol. 29, Fungal Biology Reviews. 2015. p. 63–97.
- 610 16. Kües U, Liu Y. Fruiting body production in basidiomycetes. Appl Microbiol Biotechnol.  
611 2000 Aug 15;54(2):141–52.
- 612 17. Sakamoto Y, Sato S, Ito M, Ando Y, Nakahori K, Muraguchi H. Blue light exposure and  
613 nutrient conditions influence the expression of genes involved in simultaneous hyphal knot  
614 formation in Coprinopsis cinerea. Microbiol Res. 2018 Dec;217:81–90.
- 615 18. Muraguchi H, Umezawa K, Niikura M, Yoshida M, Kozaki T, Ishii K, et al. Strand-specific  
616 RNA-seq analyses of fruiting body development in Coprinopsis cinerea. PLoS ONE.  
617 2015;10(10).
- 618 19. Stajich JE, Wilke SK, Ahren D, Au CH, Birren BW, Borodovsky M, et al. Insights into  
619 evolution of multicellular fungi from the assembled chromosomes of the mushroom  
620 Coprinopsis cinerea (Coprinus cinereus). Proc Natl Acad Sci U A. 2010/06/16.  
621 2010;107(26):11889–94.
- 622 20. Lau AY-T, Cheng X, Cheng CK, Nong W, Cheung MK, Chan RH-F, et al. Discovery of  
623 microRNA-like RNAs during early fruiting body development in the model mushroom  
624 Coprinopsis cinerea. bioRxiv [Internet]. 2018 May 17 [cited 2019 Feb 3]; Available from:  
625 <http://biorxiv.org/lookup/doi/10.1101/325217>

- 626 21. Martin F, Aerts A, Ahrén D, Brun A, Danchin EGJ, Duchaussoy F, et al. The genome of  
627 *Laccaria bicolor* provides insights into mycorrhizal symbiosis. *Nature*. 2008  
628 Mar;452(7183):88–92.
- 629 22. Nagy LG, Riley R, Tritt A, Adam C, Daum C, Floudas D, et al. Comparative genomics of  
630 early-diverging mushroom-forming fungi provides insights into the origins of  
631 lignocellulose decay capabilities. *Mol Biol Evol*. 2016;33(4):959–70.
- 632 23. Gehrman T, Pelkmans JF, Lugones LG, Wösten HAB, Abeel T, Reinders MJT.  
633 *Schizophyllum commune* has an extensive and functional alternative splicing repertoire. *Sci*  
634 *Rep*. 2016;6.
- 635 24. Pelkmans JF, Patil MB, Gehrman T, Reinders MJT, Wösten HAB, Lugones LG.  
636 Transcription factors of *schizophyllum commune* involved in mushroom formation and  
637 modulation of vegetative growth. *Sci Rep*. 2017;7(1).
- 638 25. Lugones LG, Scholtmeyer K. An abundant hydrophobin (ABHI) forms hydrophobic rodlet  
639 layers in *Agaricus bisporus* fruiting bodies. 2019;9.
- 640 26. Bayry J, Amanianda V, Latge P. Hydrophobins—Unique Fungal Proteins. *PLoS Pathog*.  
641 2012;8(5):4.
- 642 27. Wösten HAB, van Wetter M-A, Lugones LG, van der Mei HC, Busscher HJ, Wessels JGH.  
643 How a fungus escapes the water to grow into the air. *Curr Biol*. 1999 Jan;9(2):85–8.
- 644 28. Liu Y, Boulianne RP, Lu BC, Kües U, Aebi M. Fruiting body development in *Coprinus*  
645 *cinereus*: regulated expression of two galectins secreted by a non-classical pathway.  
646 *Microbiology*. 2000 Aug 1;146(8):1841–53.

- 647 29. Hassan M, Rouf R, Tiralongo E, May T, Tiralongo J. Mushroom Lectins: Specificity,  
648 Structure and Bioactivity Relevant to Human Disease. *Int J Mol Sci*. 2015 Apr  
649 8;16(12):7802–38.
- 650 30. Cooper DNW, Boulianne RP, Charlton S, Farrell EM, Sucher A, Lu BC. Fungal Galectins,  
651 Sequence and Specificity of Two Isolectins from *Coprinus cinereus*. *J Biol Chem*. 1997 Jan  
652 17;272(3):1514–21.
- 653 31. Konno N, Sakamoto Y. An endo- $\beta$ -1,6-glucanase involved in *Lentinula edodes* fruiting  
654 body autolysis. *Appl Microbiol Biotechnol*. 2011 Sep;91(5):1365–73.
- 655 32. Wessels GH. DEVELOPMENTAL REGULATION OF FUNGAL CELL WALL  
656 FORMATION. *Annu Rev Phytopathol*. 1994;32:413–37.
- 657 33. Fukuda K, Hiraga M, Asakuma S, Arai I, Sekikawa M, Urashima T. Purification and  
658 Characterization of a Novel Exo- $\beta$ -1,3-1,6-glucanase from the Fruiting Body of the Edible  
659 Mushroom Enoki (*Flammulina velutipes*). *Biosci Biotechnol Biochem*. 2008 Dec  
660 23;72(12):3107–13.
- 661 34. Liu Y. An Essential Gene for Fruiting Body Initiation in the Basidiomycete *Coprinopsis*  
662 *cinerea* Is Homologous to Bacterial Cyclopropane Fatty Acid Synthase Genes. *Genetics*.  
663 2005 Nov 4;172(2):873–84.
- 664 35. Masuda R, Iguchi N, Tukuta K, Nagoshi T, Kemuriyama K, Muraguchi H. The *Coprinopsis*  
665 *cinerea* Tup1 homologue Cag1 is required for gill formation during fruiting body  
666 morphogenesis. *Biol Open*. 2016 Dec;5(12):1844–52.

- 667 36. Cheng CK, Au CH, Wilke SK, Stajich JE, Zolan ME, Pukkila PJ, et al. 5'-Serial Analysis  
668 of Gene Expression studies reveal a transcriptomic switch during fruiting body  
669 development in *Coprinopsis cinerea*. *BMC Genomics*. 2013;14(1):195.
- 670 37. de Sena-Tomas C, Navarro-Gonzalez M, Kues U, Perez-Martin J. A DNA Damage  
671 Checkpoint Pathway Coordinates the Division of Dikaryotic Cells in the Ink Cap  
672 Mushroom *Coprinopsis cinerea*. *Genetics*. 2013 Sep 1;195(1):47–57.
- 673 38. Kontkanen H, Westerholm-Parvinen A, Saloheimo M, Bailey M, Ratto M, Mattila I, et al.  
674 Novel *Coprinopsis cinerea* Polyesterase That Hydrolyzes Cutin and Suberin. *Appl Environ*  
675 *Microbiol*. 2009 Apr 1;75(7):2148–57.
- 676 39. Martins I, Hartmann DO, Alves PC, Martins C, Garcia H, Leclercq CC, et al. Elucidating  
677 how the saprophytic fungus *Aspergillus nidulans* uses the plant polyester suberin as carbon  
678 source. *BMC Genomics*. 2014;15(1):613.
- 679 40. Gonçalves HB, Riul AJ, Quiapim AC, Jorge JA, Guimarães LHS. Characterization of a  
680 thermostable extracellular tannase produced under submerged fermentation by *Aspergillus*  
681 *ochraceus*. *Electron J Biotechnol* [Internet]. 2012 Aug 8 [cited 2019 Feb 3];15(5). Available  
682 from: <http://www.ejbiotechnology.info/index.php/ejbiotechnology/article/view/946>
- 683 41. Breschi A, Gingeras TR, Guigó R. Comparative transcriptomics in human and mouse. *Nat*  
684 *Rev Genet*. 2017 May 8;18(7):425–40.
- 685 42. Song H-Y, Kim D-H, Kim J-M. Comparative transcriptome analysis of dikaryotic mycelia  
686 and mature fruiting bodies in the edible mushroom *Lentinula edodes*. *Sci Rep* [Internet].  
687 2018 Dec [cited 2019 Feb 3];8(1). Available from: [http://www.nature.com/articles/s41598-](http://www.nature.com/articles/s41598-018-27318-z)  
688 018-27318-z

- 689 43. Rahmad N, Al-Obaidi JR, Rashid NM, Zean N, Yusoff MHY, Shaharuddin N, et al.  
690 Comparative proteomic analysis of different developmental stages of the edible mushroom  
691 *Termitomyces heimii*. *Biol Res*. 2014;47(1):30.
- 692 44. Saboti J. Aspartic Proteases from Basidiomycete *Clitocybe nebularis*. *Croat Chem Acta*.  
693 2009;7.
- 694 45. Banerjee G, Robertson DL, Leonard TJ. Hydrophobins Sc3 and Sc4 gene expression in  
695 mounds, fruiting bodies and vegetative hyphae of *Schizophyllum commune*. *Fungal Genet*  
696 *Biol*. 2008 Mar;45(3):171–9.
- 697 46. Wetter M-A, Schuren FHJ, Schuurs TA, Wessels JGH. Targeted mutation of the SC3  
698 hydrophobin gene of *Schizophyllum commune* affects formation of aerial hyphae. *FEMS*  
699 *Microbiol Lett*. 1996 Jul;140(2–3):265–9.
- 700 47. van Wetter M-A, Wösten HA., Sietsma JH, Wessels JG. Hydrophobin Gene Expression  
701 Affects Hyphal Wall Composition in *Schizophyllum commune*. *Fungal Genet Biol*. 2000  
702 Nov;31(2):99–104.
- 703 48. Baccelli I. Cerato-platanin family proteins: one function for multiple biological roles? *Front*  
704 *Plant Sci*. 2014;5:769.
- 705 49. Tovar-Herrera OE, Batista-García RA, Sánchez-Carbente MDR, Iracheta-Cárdenas MM,  
706 Arévalo-Niño K, Folch-Mallol JL. A novel expansin protein from the white-rot fungus  
707 *Schizophyllum commune*. *PLoS ONE*. 2015;10(3).

- 708 50. Costachel C, Coddeville B, Latgé J-P, Fontaine T. Glycosylphosphatidylinositol-anchored  
709 Fungal Polysaccharide in *Aspergillus fumigatus*. J Biol Chem. 2005 Dec 2;280(48):39835–  
710 42.
- 711 51. Lussier M, Sdicu A-M, Shahinian S, Bussey H. The *Candida albicans* KRE9 gene is  
712 required for cell wall -1,6-glucan synthesis and is essential for growth on glucose. Proc Natl  
713 Acad Sci. 1998 Aug 18;95(17):9825–30.
- 714 52. Brown JL, Bussey H. The Yeast KRE9 Gene Encodes an O Glycoprotein Involved in Cell  
715 Surface  $\beta$ -Glucan Assembly. MOL CELL BIOL. 1993;13:11.
- 716 53. Robledo-Briones M, Ruiz-Herrera J. Regulation of genes involved in cell wall synthesis  
717 and structure during *Ustilago maydis* dimorphism. FEMS Yeast Res. 2013;13(1):74–84.
- 718 54. Szeto CY, Leung GS, Kwan HS. Le.MAPK and its interacting partner, Le.DRMIP, in  
719 fruiting body development in *Lentinula edodes*. Gene. 2007/03/27. 2007;393(1–2):87–93.
- 720 55. Park Y-J, Baek JH, Lee S, Kim C, Rhee H, Kim H, et al. Whole Genome and Global Gene  
721 Expression Analyses of the Model Mushroom *Flammulina velutipes* Reveal a High  
722 Capacity for Lignocellulose Degradation. Schmoll M, editor. PLoS ONE. 2014  
723 Apr;9(4):e93560.
- 724 56. Zhang J, Ren A, Chen H, Zhao M, Shi L, Chen M, et al. Transcriptome Analysis and Its  
725 Application in Identifying Genes Associated with Fruiting Body Development in  
726 Basidiomycete *Hypsizygus marmoreus*. Nowrousian M, editor. PLoS ONE. 2015  
727 Apr;10(4):e0123025.



- 728 57. Wang M, Gu B, Huang J, Jiang S, Chen Y, Yin Y, et al. Transcriptome and Proteome  
729 Exploration to Provide a Resource for the Study of *Agrocybe aegerita*. Carter DA, editor.  
730 PLoS ONE. 2013 Feb 13;8(2):e56686.
- 731 58. Sakamoto Y, Nakade K, Sato S, Yoshida K, Miyazaki K, Natsume S, et al. *Lentinula*  
732 *edodes* Genome Survey and Postharvest Transcriptome Analysis. *Appl Environ Microbiol.*  
733 2017 15;83(10).
- 734 59. Sakamoto Y, Irie T, Sato T. Isolation and characterization of a fruiting body-specific exo-  
735 beta-1,3-glucanase-encoding gene, *exg1*, from *Lentinula edodes*. *Curr Genet.* 2005  
736 Apr;47(4):244–52.
- 737 60. Ene IV, Walker LA, Schiavone M, Lee KK, Martin-Yken H, Dague E, et al. Cell Wall  
738 Remodeling Enzymes Modulate Fungal Cell Wall Elasticity and Osmotic Stress Resistance.  
739 *mBio* [Internet]. 2015 Sep 1 [cited 2019 Feb 3];6(4). Available from:  
740 <http://mbio.asm.org/lookup/doi/10.1128/mBio.00986-15>
- 741 61. Hurtado-Guerrero R, Schüttelkopf AW, Mouyna I, Ibrahim AFM, Shepherd S, Fontaine T,  
742 et al. Molecular Mechanisms of Yeast Cell Wall Glucan Remodeling. *J Biol Chem.* 2009  
743 Mar 27;284(13):8461–9.
- 744 62. Sakamoto Y, Watanabe H, Nagai M, Nakade K, Takahashi M, Sato T. *Lentinula edodes*  
745 *tlg1* encodes a thaumatin-like protein that is involved in lentinan degradation and fruiting  
746 body senescence. *Plant Physiol.* 2006;141:793–801.
- 747 63. Busch S, Braus GH. How to build a fungal fruit body: from uniform cells to specialized  
748 tissue. *Mol Microbiol.* 2007;64(4):873–6.

- 749 64. Buser R, Lazar Z, Käser S, Künzler M, Aebi M. Identification, Characterization, and  
750 Biosynthesis of a Novel *N*-Glycan Modification in the Fruiting Body of the Basidiomycete  
751 *Coprinopsis cinerea*. *J Biol Chem*. 2010 Apr 2;285(14):10715–23.
- 752 65. Plaza D, Lin C-W, van der Velden NS, Aebi M, Künzler M. Comparative transcriptomics  
753 of the model mushroom *Coprinopsis cinerea* reveals tissue-specific armories and a  
754 conserved circuitry for sexual development. *BMC Genomics*. 2014;15(1):492.
- 755 66. Rajam MV, Chandola N, Saiprasad Goud P, Singh D, Kashyap V, Choudhary ML, et al.  
756 Thaumatin gene confers resistance to fungal pathogens as well as tolerance to abiotic  
757 stresses in transgenic tobacco plants. *Biol Plant*. 2007 Mar;51(1):135–41.
- 758 67. Zhang Y, Yan H, Wei X, Zhang J, Wang H, Liu D. Expression analysis and functional  
759 characterization of a pathogen-induced thaumatin-like gene in wheat conferring enhanced  
760 resistance to *Puccinia triticina*. *J Plant Interact*. 2017 Jan;12(1):332–9.
- 761 68. Zhang J, Wang F, Liang F, Zhang Y, Ma L, Wang H, et al. Functional analysis of a  
762 pathogenesis-related thaumatin-like protein gene TaLr35PR5 from wheat induced by leaf  
763 rust fungus. *BMC Plant Biol* [Internet]. 2018 Dec [cited 2019 Feb 3];18(1). Available from:  
764 <https://bmcpantbiol.biomedcentral.com/articles/10.1186/s12870-018-1297-2>
- 765 69. Grenier J, Potvin C, Asselin A. Some Fungi Express beta-1,3-Glucanases Similar to  
766 Thaumatin-like Proteins. *Mycologia*. 2000 Sep;92(5):841.
- 767 70. Chen H, Kovalchuk A, Keriö S, Asiegbu FO. Distribution and bioinformatic analysis of the  
768 cerato-platanin protein family in Dikarya. *Mycologia*. 2013 Nov;105(6):1479–88.

- 769 71. Gaderer R, Bonazza K, Seidl-Seiboth V. Cerato-platanins: A fungal protein family with  
770 intriguing properties and application potential. Vol. 98, Applied Microbiology and  
771 Biotechnology. 2014. p. 4795–803.
- 772 72. Boraston AB, Tomme P, Amandoron EA, Kilburn DG. A novel mechanism of xylan  
773 binding by a lectin-like module from *Streptomyces lividans* xylanase 10A. 2000;9.
- 774 73. Fujimoto Z. Structure and Function of Carbohydrate-Binding Module Families 13 and 42 of  
775 Glycoside Hydrolases, Comprising a  $\beta$ -Trefoil Fold. Biosci Biotechnol Biochem. 2013 Jul  
776 23;77(7):1363–71.
- 777 74. Schubert M, Bleuler-Martinez S, Butschi A, Wälti MA, Egloff P, Stutz K, et al. Plasticity of  
778 the  $\beta$ -trefoil protein fold in the recognition and control of invertebrate predators and  
779 parasites by a fungal defence system. PLoS Pathog. 2012;8(5).
- 780 75. Collins T, Stone JR, Williams AJ. All in the Family: the BTB/POZ, KRAB, and SCAN  
781 Domains. Mol Cell Biol. 2001 Jun 1;21(11):3609–15.
- 782 76. Connelly C, Hieter P. Budding Yeast SKP1 Encodes an Evolutionarily Conserved  
783 Kinetochores Protein Required for Cell Cycle Progression. Cell. 1996 Jul;86(2):275–85.
- 784 77. Pelkmans JF, Vos AM, Scholtmeijer K, Hendrix E, Baars JJP, Gehrman T, et al. The  
785 transcriptional regulator c2h2 accelerates mushroom formation in *Agaricus bisporus*. Appl  
786 Microbiol Biotechnol. 2016;100(16):7151–9.
- 787 78. Morin E, Kohler A, Baker AR, Foulongne-Oriol M, Lombard V, Nagy LG, et al. Genome  
788 sequence of the button mushroom *Agaricus bisporus* reveals mechanisms governing

- 789 adaptation to a humic-rich ecological niche. Proc Natl Acad Sci U S A. 2012 Oct  
790 23;109(43):17501–6.
- 791 79. Zhou Y, Chen L, Fan X, Bian Y. De Novo Assembly of Auricularia polytricha  
792 Transcriptome Using Illumina Sequencing for Gene Discovery and SSR Marker  
793 Identification. Freitag M, editor. PLoS ONE. 2014 Mar 13;9(3):e91740.
- 794 80. Endo H, Kajiwarra S, Tsunoka O, Shishido K. A novel cDNA, priBc, encoding a protein  
795 with a Zn(II)<sub>2</sub>Cys<sub>6</sub> zinc cluster DNA-binding motif, derived from the basidiomycete  
796 *Lentinus edodes*. Gene. 1994 Feb 11;139(1):117–21.
- 797 81. Miyazaki Y, Tsunoka O, Shishido K. Determination of the DNA-Binding Sequences of the  
798 Zn(II)<sub>2</sub>Cys<sub>6</sub> Zinc-Cluster-Containing PRIB Protein, Derived from the Basidiomycete  
799 *Lentinus edodes* Gene. J Biochem (Tokyo). 1997 Dec 1;122(6):1088–91.
- 800 82. Muraguchi H, Fujita T, Kishibe Y, Konno K, Ueda N, Nakahori K, et al. The *exp1* gene  
801 essential for pileus expansion and autolysis of the inky cap mushroom *Coprinopsis cinerea*  
802 (*Coprinus cinereus*) encodes an HMG protein. Fungal Genet Biol. 2008 Jun;45(6):890–6.
- 803 83. Trail F, Wang Z, Stefanko K, Cubba C, Townsend JP. The ancestral levels of transcription  
804 and the evolution of sexual phenotypes in filamentous fungi. Fraser HB, editor. PLOS  
805 Genet. 2017 Jul 13;13(7):e1006867.
- 806 84. Pellegrin C, Morin E, Martin FM, Veneault-Fourrey C. Comparative Analysis of  
807 Secretomes from Ectomycorrhizal Fungi with an Emphasis on Small-Secreted Proteins.  
808 Front Microbiol. 2015 Nov;6:1278.

- 809 85. de Freitas Pereira M, Veneault-Fourrey C, Vion P, Guinet F, Morin E, Barry KW, et al.  
810 Secretome Analysis from the Ectomycorrhizal Ascomycete *Cenococcum geophilum*. *Front*  
811 *Microbiol* [Internet]. 2018 Feb 13 [cited 2019 Feb 3];9. Available from:  
812 <http://journal.frontiersin.org/article/10.3389/fmicb.2018.00141/full>
- 813 86. Pellegrin C, Daguerre Y, Ruytinx J, Guinet F, Kempainen M, Plourde MB, et al. *Laccaria*  
814 *bicolor* MiSSP8 is a small-secreted protein decisive for the establishment of the  
815 ectomycorrhizal symbiosis. *bioRxiv* [Internet]. 2017 Dec 4 [cited 2019 Feb 3]; Available  
816 from: <http://biorxiv.org/lookup/doi/10.1101/218131>
- 817 87. Feldman D, Kowbel DJ, Glass NL, Yarden O, Hadar Y. A role for small secreted proteins  
818 (SSPs) in a saprophytic fungal lifestyle: Ligninolytic enzyme regulation in *Pleurotus*  
819 *ostreatus*. *Sci Rep*. 2017;7(1).
- 820 88. Grabherr MG, Haas BJ, Yassour M, Levin JZ, Thompson DA, Amit I, et al. Full-length  
821 transcriptome assembly from RNA-Seq data without a reference genome. *Nat Biotechnol*.  
822 2011 May 15;29(7):644–52.
- 823 89. Grigoriev I V, Nikitin R, Haridas S, Kuo A, Ohm R, Otilar R, et al. MycoCosm portal:  
824 Gearing up for 1000 fungal genomes. *Nucleic Acids Res*. 2014;42(D1).
- 825 90. Robinson MD, McCarthy DJ, Smyth GK. edgeR: a Bioconductor package for differential  
826 expression analysis of digital gene expression data. *Bioinforma Oxf Engl*. 2010;26(1):139–  
827 40.
- 828 91. Ritchie ME, Phipson B, Wu D, Hu Y, Law CW, Shi W, et al. Limma powers differential  
829 expression analyses for RNA-sequencing and microarray studies. *Nucleic Acids Res*.  
830 2015;43(7):e47.

- 831 92. Katoh K, Standley DM. MAFFT multiple sequence alignment software version 7:  
832 improvements in performance and usability. *Mol Biol Evol.* 2013 Apr;30(4):772–80.
- 833 93. Emms DM, Kelly S. OrthoFinder: solving fundamental biases in whole genome  
834 comparisons dramatically improves orthogroup inference accuracy. *Genome Biol* [Internet].  
835 2015 Dec [cited 2019 Feb 4];16(1). Available from:  
836 <http://genomebiology.com/2015/16/1/157>
- 837 94. Lombard V, Golaconda Ramulu H, Drula E, Coutinho PM, Henrissat B. The carbohydrate-  
838 active enzymes database (CAZy) in 2013. *Nucleic Acids Res.* 2014;42(D1).
- 839 95. Revell LJ. SIZE-CORRECTION AND PRINCIPAL COMPONENTS FOR  
840 INTERSPECIFIC COMPARATIVE STUDIES. *Evolution.* 2009 Dec;63(12):3258–68.
- 841 96. Revell LJ. phytools: An R package for phylogenetic comparative biology (and other  
842 things). *Methods Ecol Evol.* 2012;3(2):217–23.
- 843 97. Hanks SK, Hunter T. Protein kinases 6. The eukaryotic protein kinase superfamily: kinase  
844 (catalytic) domain structure and classification. *FASEB J Off Publ Fed Am Soc Exp Biol.*  
845 1995 May;9(8):576–96.
- 846 98. Manning G, Whyte DB, Martinez R, Hunter T, Sudarsanam S. The protein kinase  
847 complement of the human genome. *Vol. 298, Science.* 2002. p. 1912–34.
- 848 99. Petersen TN, Brunak S, Von Heijne G, Nielsen H. SignalP 4.0: Discriminating signal  
849 peptides from transmembrane regions. *Vol. 8, Nature Methods.* 2011. p. 785–6.
- 850 100. Horton P, Park KJ, Obayashi T, Fujita N, Harada H, Adams-Collier CJ, et al. WoLF  
851 PSORT: Protein localization predictor. *Nucleic Acids Res.* 2007;35(SUPPL.2).

852 101. Krogh A, Larsson B, von Heijne G, Sonnhammer EL. Predicting transmembrane protein  
 853 topology with a hidden Markov model: application to complete genomes. J Mol Biol. 2001  
 854 Jan 19;305(3):567–80.

855

856 **Figure Legends**

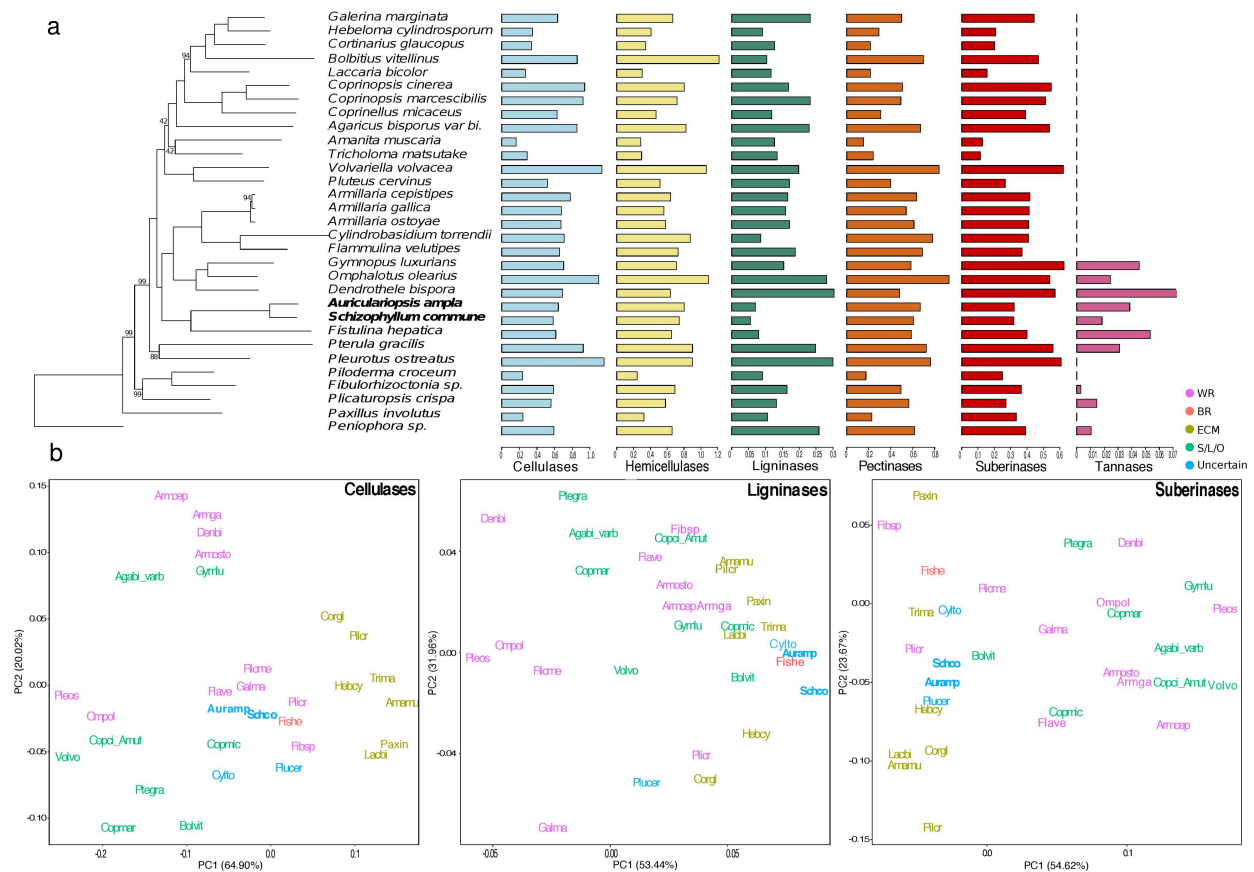

857

858 **Figure 1.** Phylogenetic relationships and lignocellulose degrading gene repertoire of *A. ampla*

859 compared to *S. commune* and 29 other Agaricomycetes. A, species tree showing the phylogenetic

860 affinities of the Schizophyllaceae (bold, left panel) and copy number distribution of cellulose,

861 hemicellulose, pectin, lignin degrading gene families as well as those of putative suberinases and

862 tannases. B, phylogenetic principal component analyses of cellulose, lignin and suberin

863 degrading enzymes. Species names colored based on nutritional mode (WR - white rot, BR -

864 brown rot, ECM - ectomycorrhizal, S/L/O - soil and litter decomposer, Uncertain - nutritional  
865 mode not known with certainty). For better visibility, a few species have been moved slightly on  
866 the plots (information in Supplementary Table 5) See also Supplementary Figure 1 for original  
867 plots.

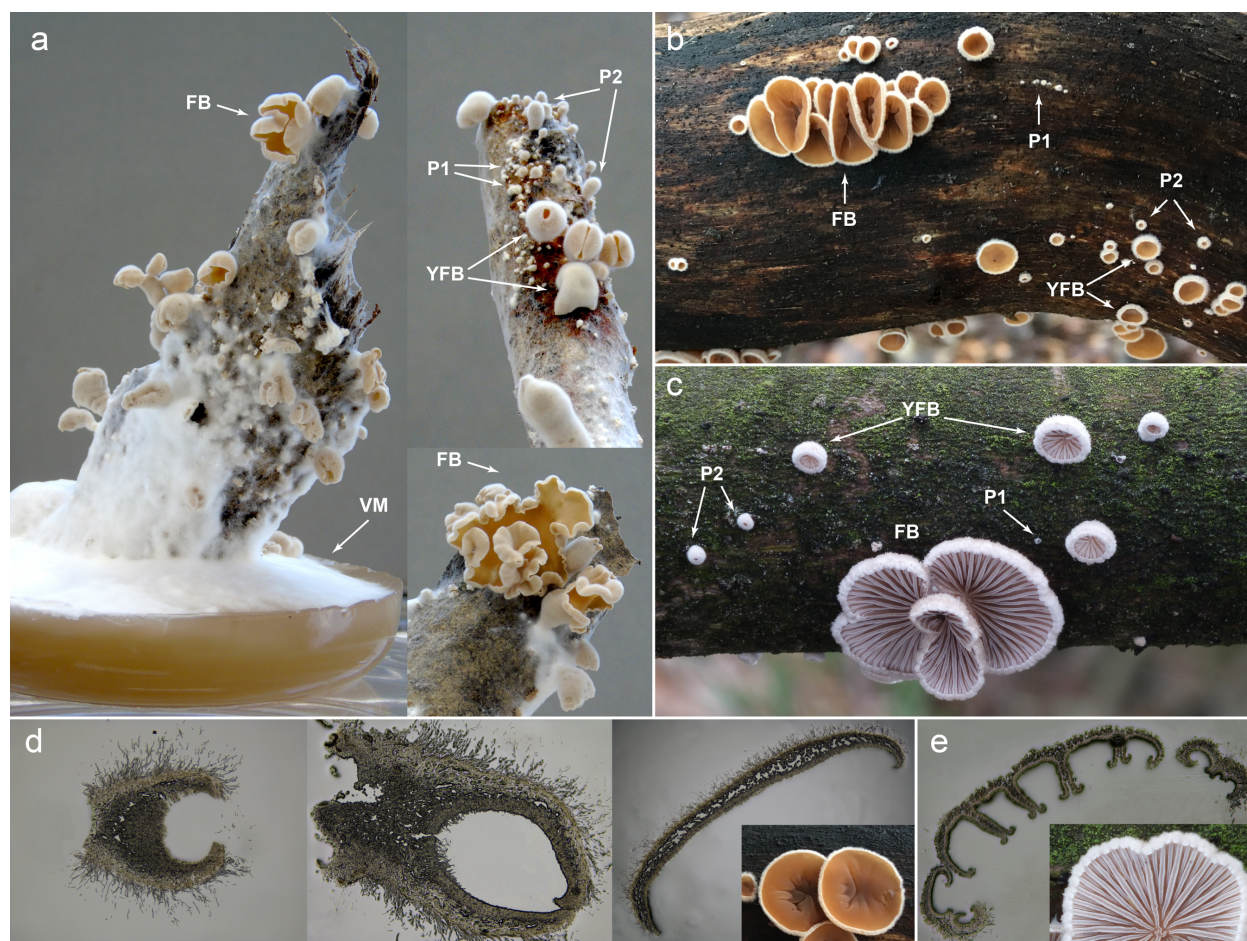

868  
869 **Figure 2.** Fruiting bodies and developmental stages of *A. ampla* and *S. commune*.  
870 Developmental stages are indicated on each panel. A, fruiting bodies of *A. ampla* produced in  
871 vitro, on sections of barked poplar logs plugged into malt-extract agar. B and C, fruiting bodies  
872 of *A. ampla* and *S. commune* in their natural habitat. D, cross sections of developmental stages of  
873 *A. ampla*: left - stage 1 primordium (left), stage 2 primordium (middle) and mature fruiting body  
874 (right). E, Cross section of a mature fruiting body of *S. commune*, showing congregated single  
875 fruiting bodies.



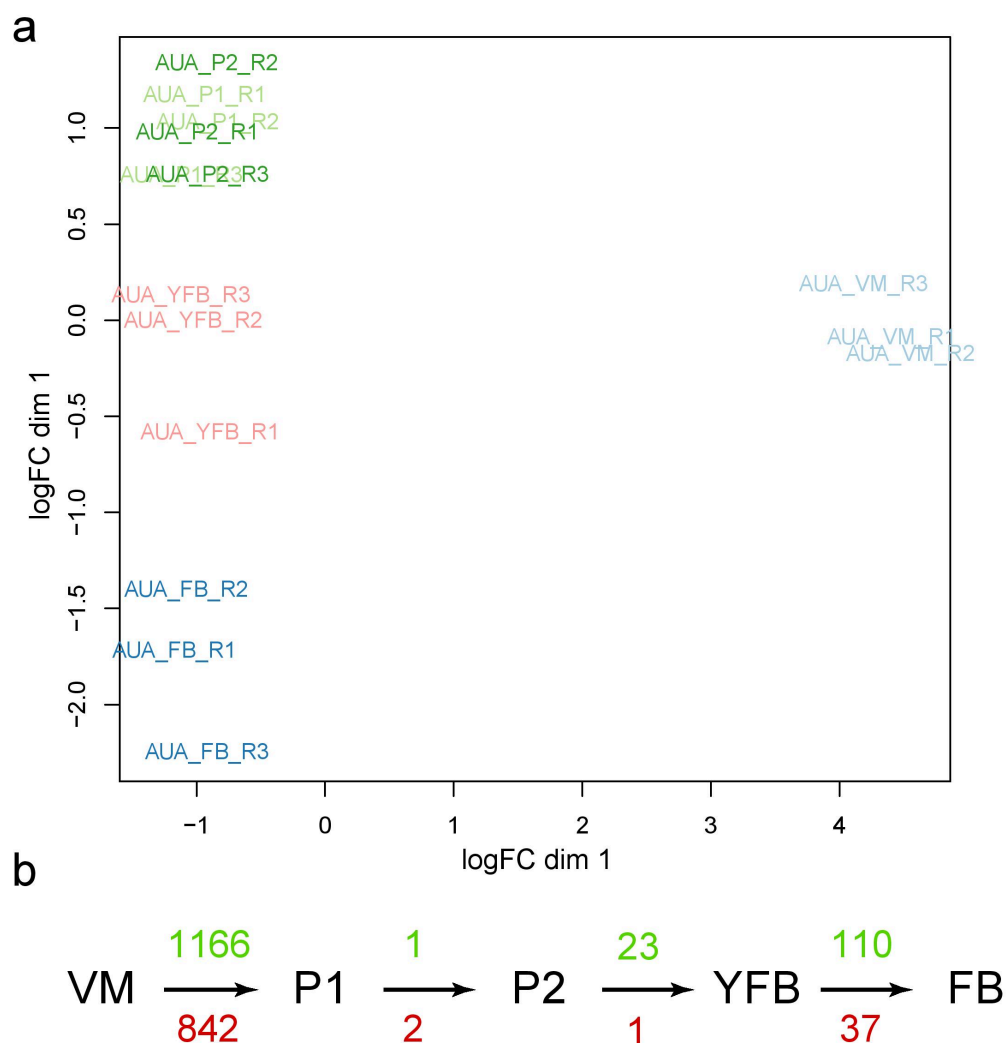

876

877 **Figure 3.** Overview of the developmental transcriptome of *A. ampla*. A, Multi-dimensional  
878 scaling for RNA-Seq replicates from 5 developmental stages of *Auriculariopsis ampla*.

879 Biological replicates belonging to similar tissue type group together. The replicates for P1 and

880 P2 cluster together and remaining developmental stages keep apart. B, Graphical representation

881 of number of significantly upregulated (green) and downregulated (red) genes among

882 developmental stages and tissue types in *A. ampla*.

883 Abbreviations: VM - vegetative mycelium, P1 - stage 1 primordium, P2 - stage 2 primordium,

884 YFB - young fruiting body, FB - mature fruiting body.

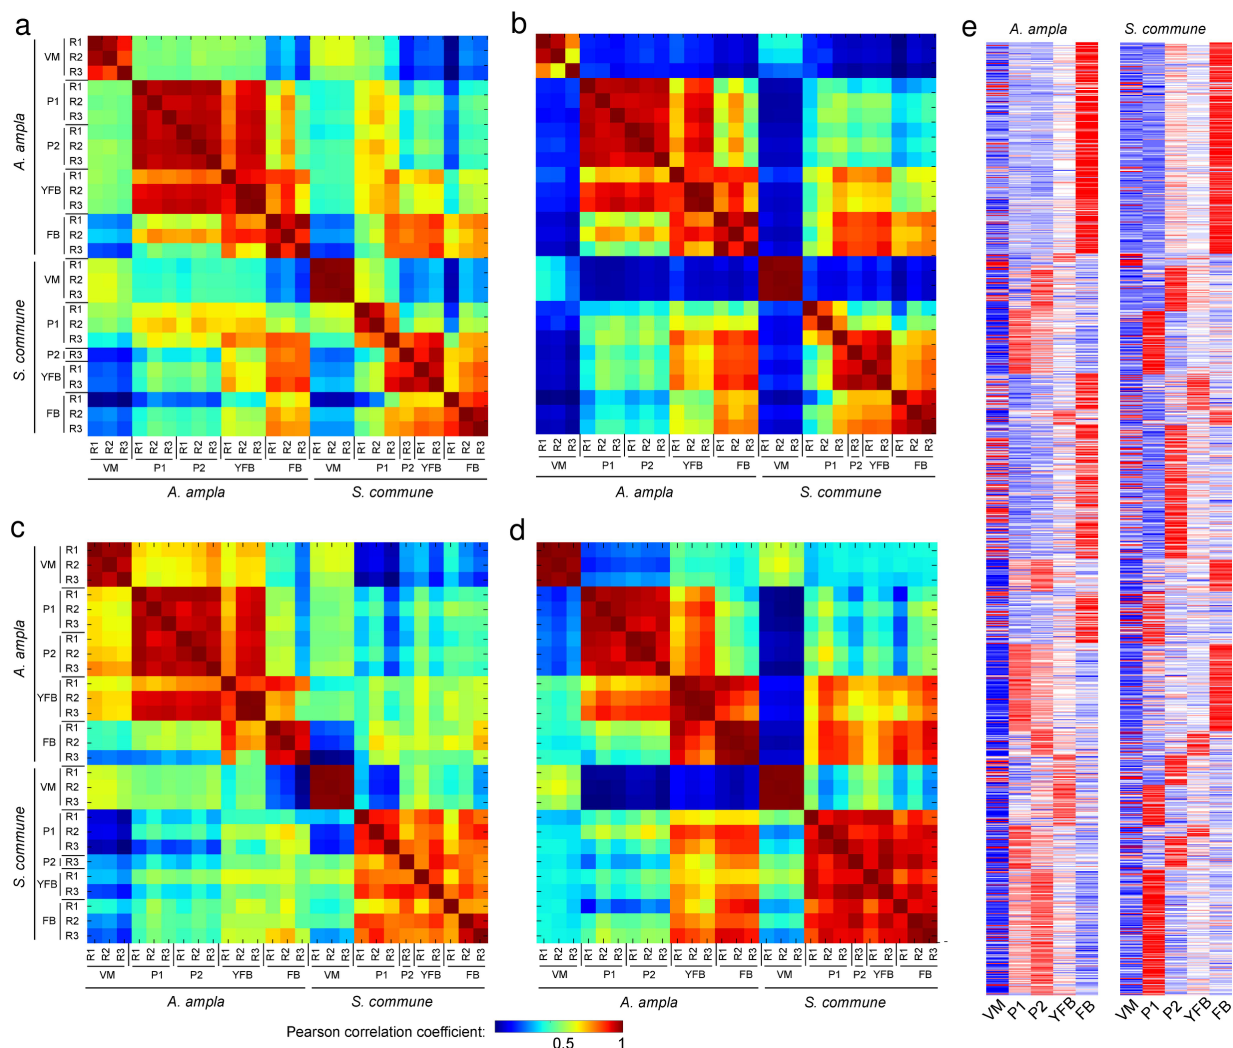

885

886 **Figure 4.** Global transcriptome similarity between developmental transcriptomes of *A. ampla*  
 887 and *S. commune*. Pearson correlation coefficient-based heatmaps show similarity among  
 888 developmental stages of the two species for all 7369 co-orthologs (A), for 1182 developmentally  
 889 regulated co-orthologs (B), for 252 co-orthologous transcription factor pairs (C) and 42  
 890 developmentally regulated co-orthologous TF pairs (D). Warmer color indicates higher  
 891 similarity. Biological replicates are indicated next to the heatmap (R1-R3). E, paired heatmap of  
 892 gene expression (FPKM) for 7369 co-orthologous gene pairs between *A. ampla* and *S. commune*.  
 893 Developmental stages for both species are as follows: VM - vegetative mycelium, P1 - stage 1  
 894 primordium, P2 - stage 2 primordium, YFB - young fruiting body, FB - mature fruiting body.

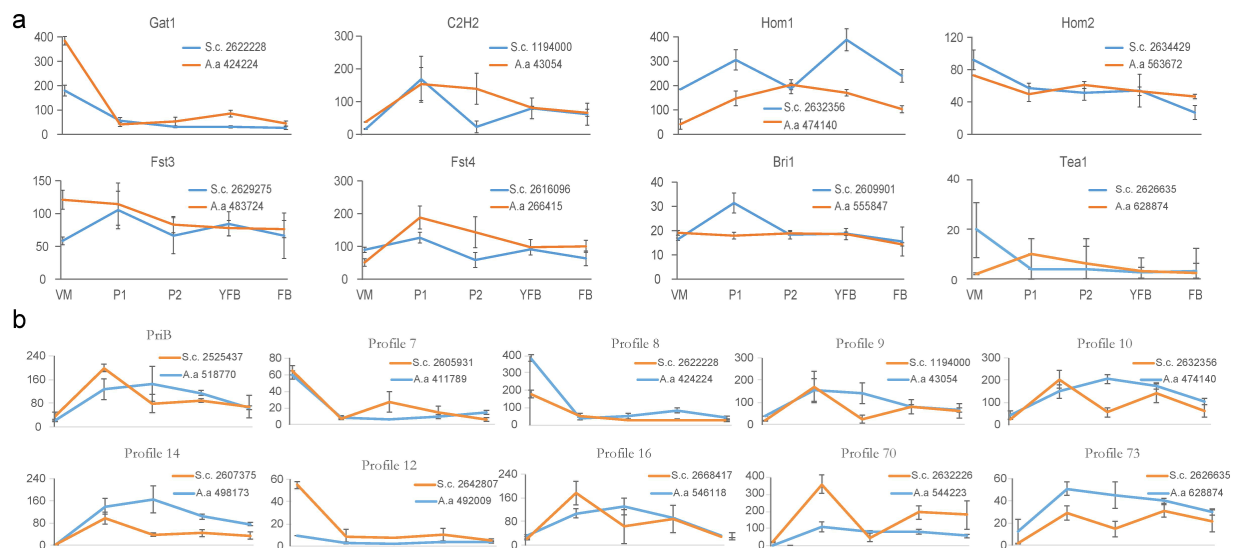

895

896 **Figure 5.** The expression patterns of developmentally regulated co-orthologous transcription  
 897 factors and their similarity across the two species. A, Expression patterns for 8 previously  
 898 characterized TFs in *S. commune* and *A. ampla*. B, developmentally regulated co-orthologous  
 899 TFs in the two species with high expression dynamics during fruiting body development. *S.*  
 900 *commune* and *A. ampla* genes are shown by blue and orange lines respectively.

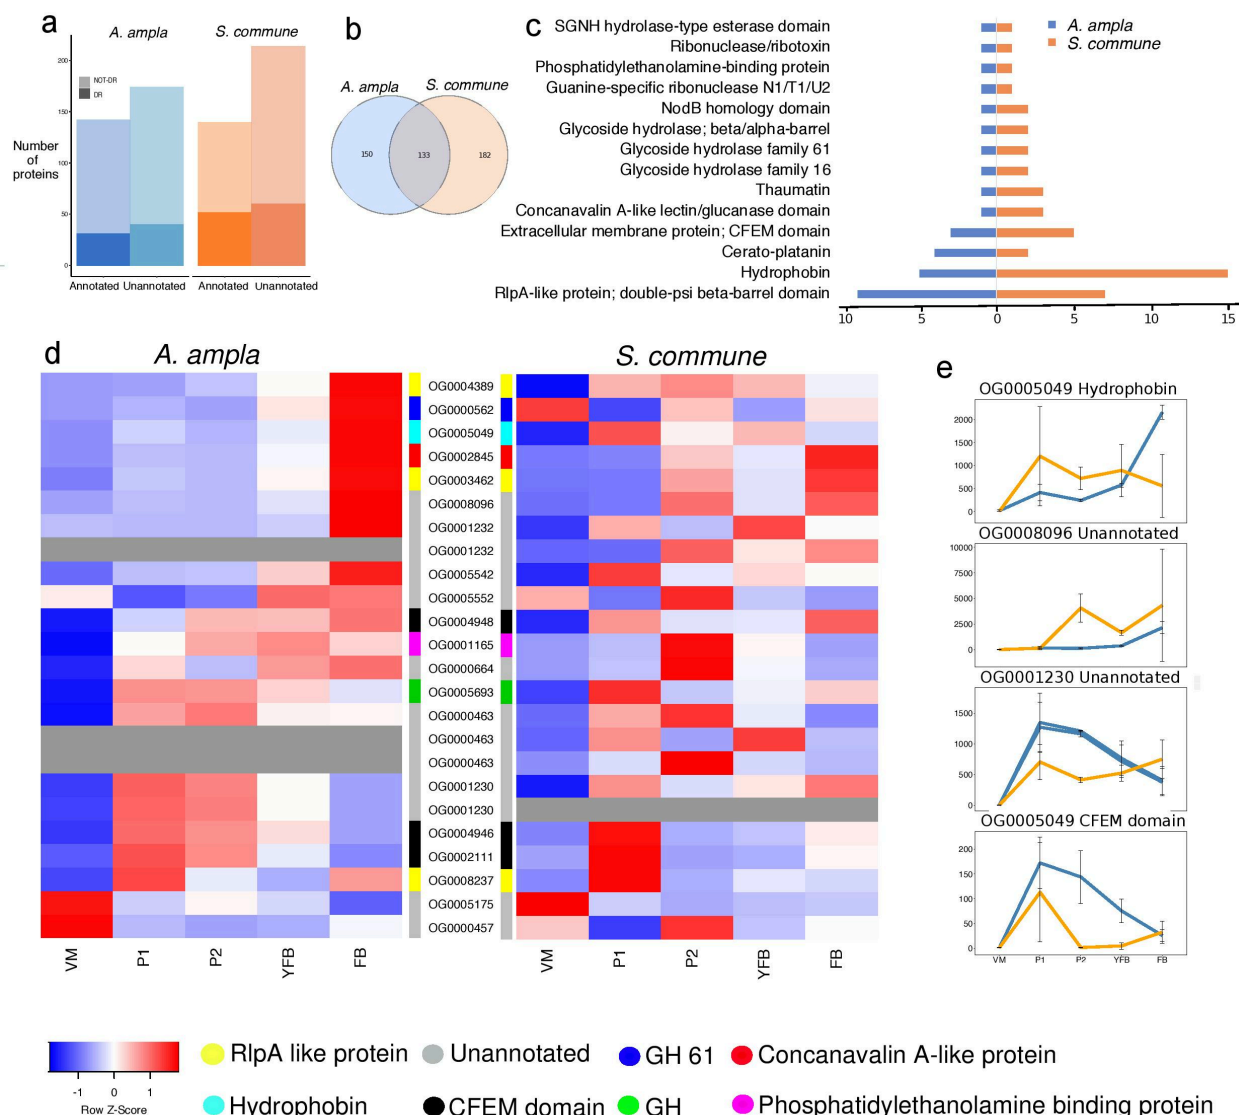

901  
902 **Figure 6.** Small secreted proteins in fruiting body transcriptomes. A, The repertoires of  
903 annotated vs unannotated and developmentally regulated (DR) vs. non-developmentally  
904 regulated (NOT-DR) SSPs in fruiting body transcriptomes of *A. ampla* and *S. commune*. B,  
905 Venn-diagram depicting orthology relationships among SSPs of the two species. Number in each  
906 cell represent the number of shared or species-specific orthogroups. C, functional annotation  
907 terms (InterPro domains) present in SSPs of both *A. ampla* and *S. commune*. Terms specific to  
908 either species are not shown. D, expression heatmaps of co-orthologous SSPs in the two species.

909 Orthogroup IDs are shown next to rows. Blue and red correspond to low and high expression,  
910 respectively. Greyed-out rows denote missing genes in orthogroup in which the 2 species did not  
911 have the same number of genes. Color coded bar next to heatmap shows functional annotations  
912 of the orthogroups. See Supplementary Figure 4 for heatmaps of species-specific genes. E,  
913 expression profiles of genes in four of the orthogroups through development, including two  
914 orthogroups of unannotated genes. Blue and orange denote *Auriculariopsis* and *Schizophyllum*  
915 genes, respectively. Variances across the three biological replicates are shown at corresponding  
916 developmental stages. See Supplementary Table 6 for protein IDs.

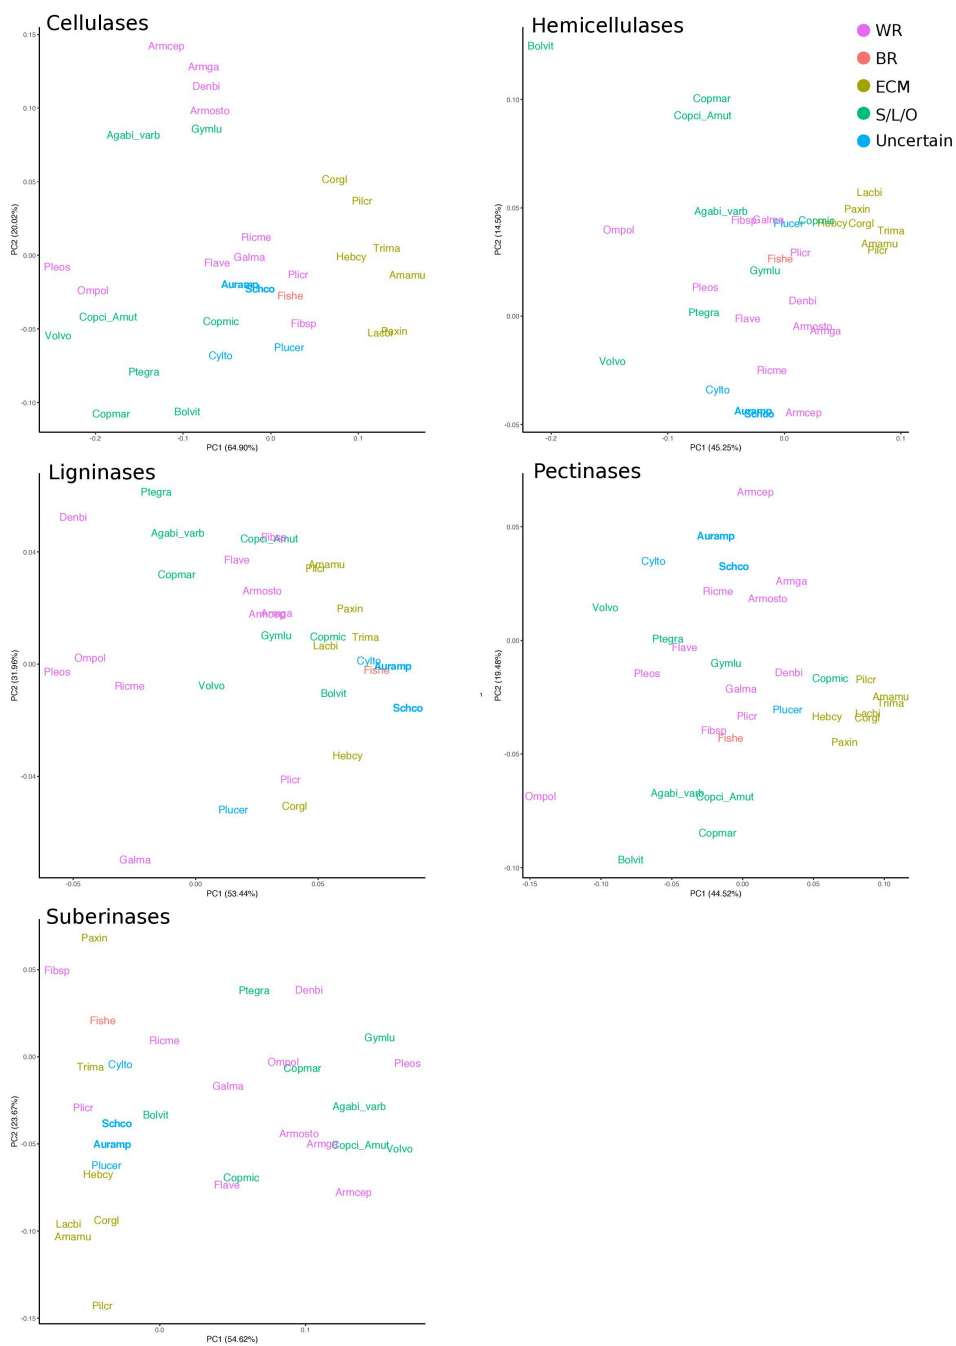

917

918 **Supplementary Figure 1.** Phylogenetic Principal Component Analysis (PCA) based on  
 919 CAZyme family copy numbers in 31 species. CAZymes categorized into 5 substrates -  
 920 cellulases, hemicellulases, ligninases, pectinases and putative suberinases and the copy numbers  
 921 normalized according to their proteome sizes along with ML species tree were used for the  
 922 phylogenetic PCA. Species have been colored according to their nutritional modes.

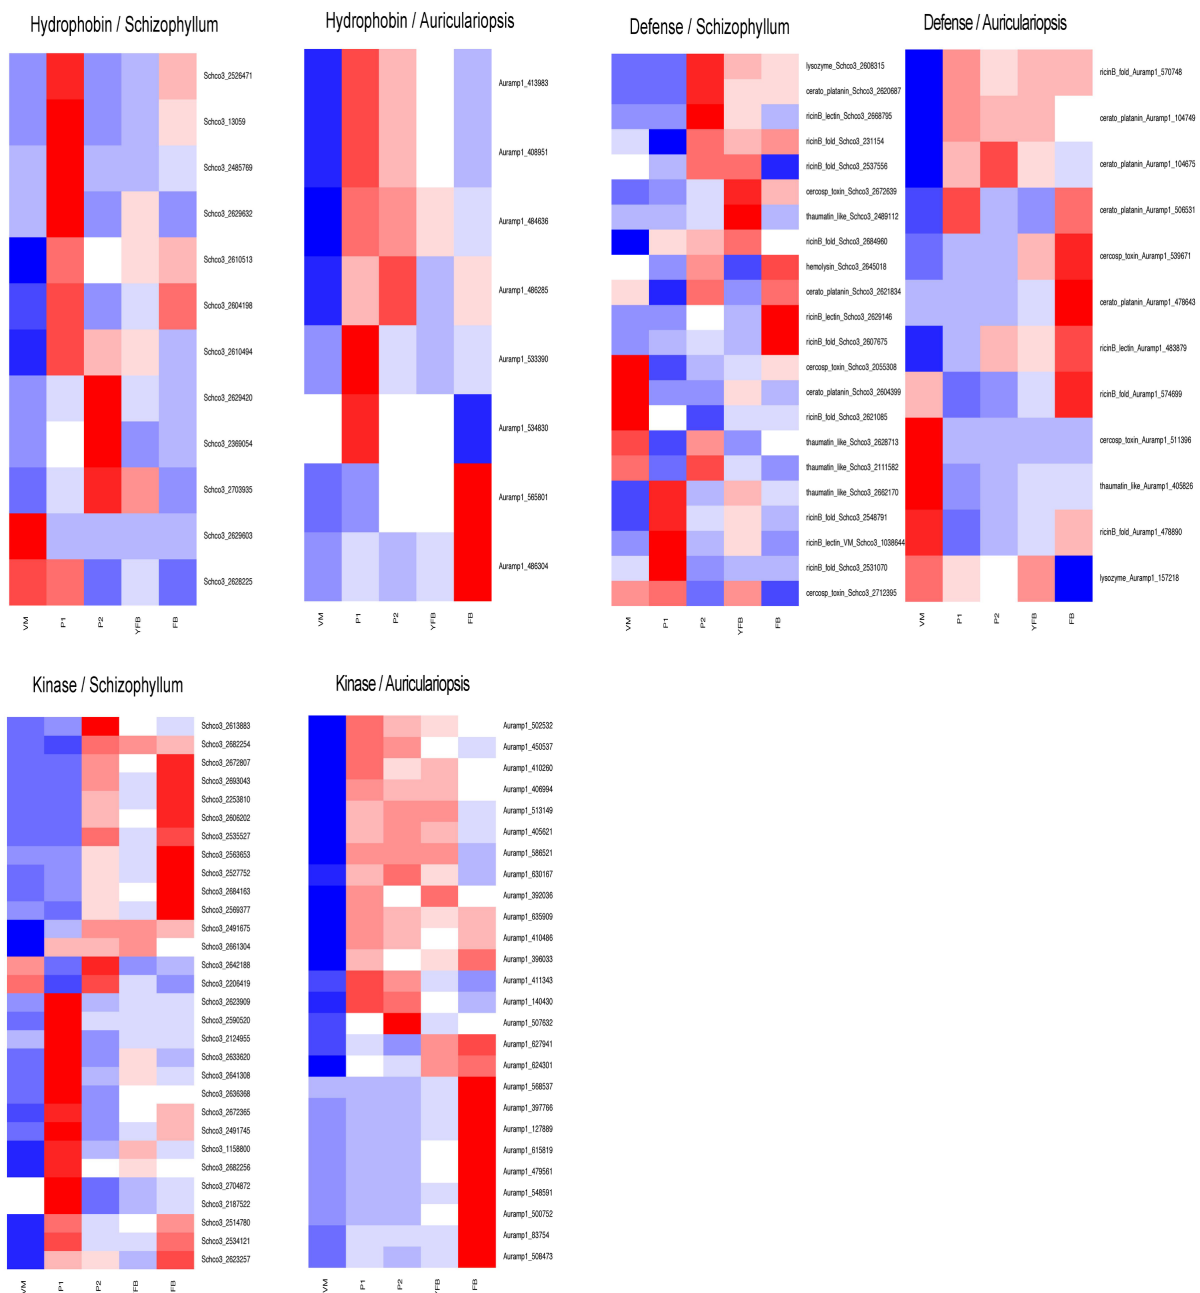

923

924 **Supplementary Figure 2.** Heatmaps of developmentally regulated genes for families having a  
 925 putative role in fruiting body formation. Developmental stages in both species are abbreviated  
 926 as ‘VM’ vegetative mycelium; ‘P1’ stage 1 primordium; ‘P2’ stage 2 primordium; ‘YFB’ young  
 927 fruiting body; and ‘FB’ fruiting body.

928

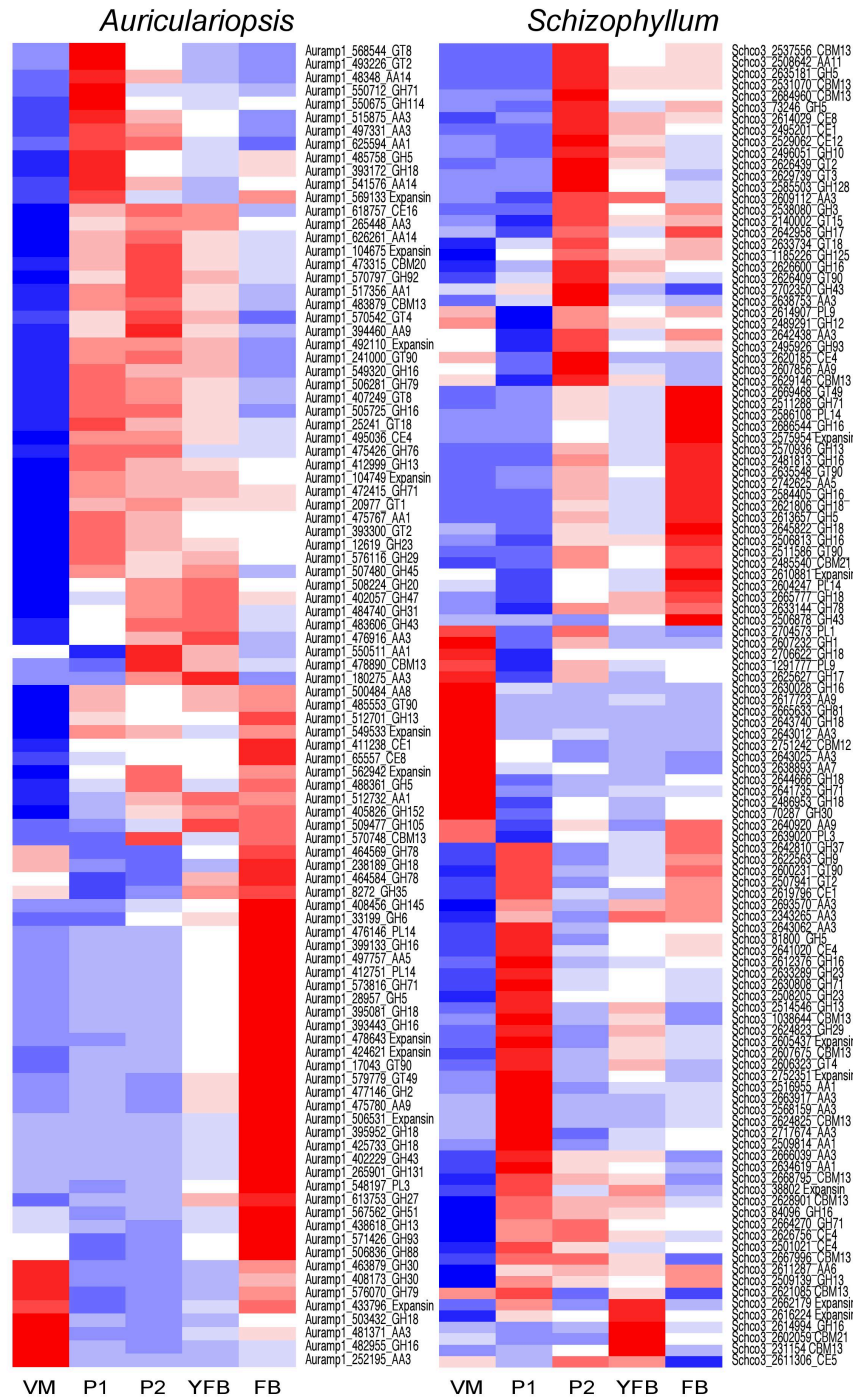

929

930 **Supplementary Figure 3.** Heatmaps of developmentally regulated Carbohydrate

931 Active Enzymes (CAZymes) in the two species. Abbreviations: ‘VM’ vegetative mycelium; ‘P1’

932 stage 1 primordium; ‘P2’ stage 2 primordium; ‘YFB’ young fruiting body; and ‘FB’ fruiting

933 body.



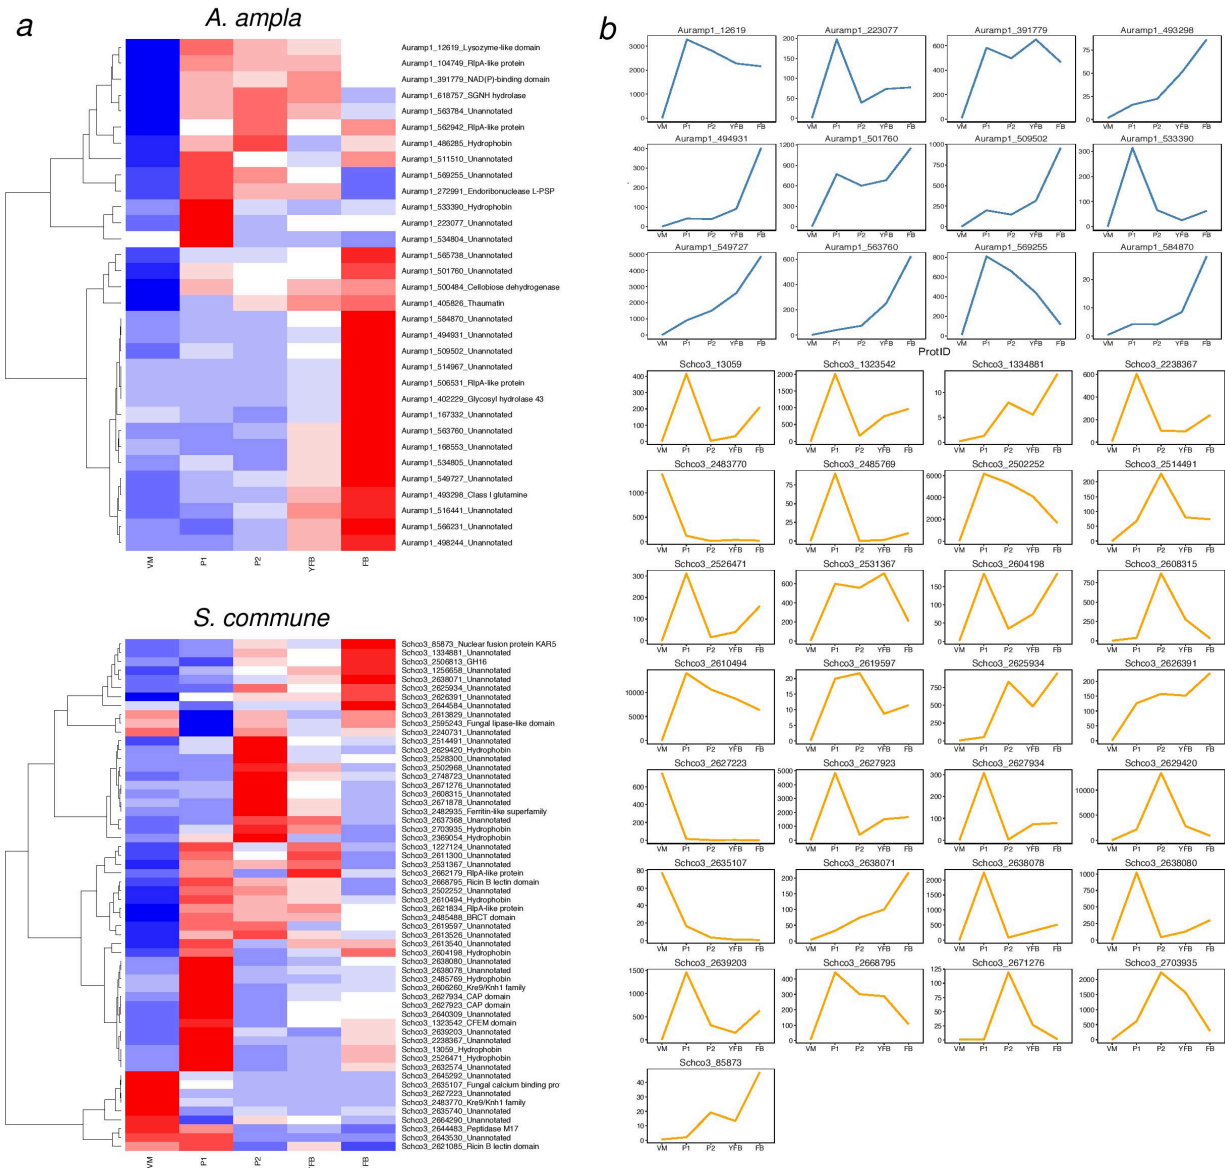

934

935 **Supplementary Figure 4.** Developmentally regulated and species-specific small secreted

936 proteins (SSPs) in the two species. A, Heatmaps of species specific SSPs in *A. ampla* (top) and *S.*

937 *commune* (bottom); B, expression profiles of genes having high expression dynamics (FC>50).

938 Genes in *A. ampla* and *S. commune* are shown in blue and orange respectively.
